# Supplementary material for: Microwave-assisted Cu(I)-catalyzed, three-component synthesis of 2-(4-((1-phenyl-1H-1,2,3-triazol-4-yl)methoxy)phenyl)-1H-benzo[d]imidazoles
Source: publisher site journal article supplement (doi:10.3762/bjoc.10.145), 2014-06-24

## Supporting Information

### Microwave-Assisted Cu(I)-Catalyzed, Three-Component Synthesis of 2-(4-((1-phenyl-1H-1,2,3-triazol-4-yl)methoxy)phenyl)-1H-benzo[d]imidazoles

Yogesh Kumar,<sup>1</sup> Vijay Bahadur,<sup>1</sup> Anil K. Singh,<sup>1</sup> Virinder S. Parmar,<sup>1</sup> Erik V. Van der Eycken<sup>2</sup> and Brajendra K. Singh\*<sup>1</sup>

<sup>1</sup>*Bioorganic Laboratory, Department of Chemistry, University of Delhi, Delhi 110 007, India*

<sup>2</sup>*Laboratory for Organic & Microwave-Assisted Chemistry (LOMAC), Department of Chemistry, University of Leuven (KU Leuven), Celestijnenlaan 200F, B-3001 Leuven, Belgium*

\* *Corresponding authors: Email id*

[singhbk@chemistry.du.ac.in](mailto:singhbk@chemistry.du.ac.in)

### **Experimental procedures and analytical data**

Contents:

|                                           |    |
|-------------------------------------------|----|
| 1. General considerations                 | 2  |
| 2. Experimental procedures                | 2  |
| 3. References                             | 3  |
| 3. Analytical data                        | 4  |
| 4. Copies of NMR spectra for new compound | 13 |

## 1. General considerations

Analytical TLCs were performed on Merck silica gel 60<sub>F254</sub> plates. IR spectra were recorded on a Perkin-Elmer 2000 FT-IR spectrometer at Department of Chemistry, University of Delhi. The <sup>1</sup>H and <sup>13</sup>C NMR spectra (in DMSO-*d*<sub>6</sub>) were recorded on a JEOL ECX-400P NMR at 400 MHz and 100 MHz respectively at USIC, University of Delhi, TMS was used as internal standard. The NMR spectra were processed by JEOL Delta<sup>TM</sup> NMR data processing softwares. The chemical shift values are on a δ scale and coupling constant (*J*) are in Hz. Abbreviations used are: s (singlet), d (doublet), t (triplet), dd (double doublet) and m (multiplet). The high-resolution mass spectra analysis was obtained JEOL JMS-SX-102A spectrometer at Institut für Chemie und Biochemie, Free University Berlin, Takustr. 3, 14195, Berlin, Germany. Melting points were recorded on a Büchi M-560 melting point apparatus. All the chemical reagents were purchased from commercial sources and used as received unless otherwise indicated.

## 2. Experimental procedures:

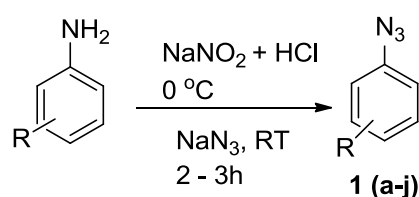

R = H, 4-OCH<sub>3</sub>, 3-OCH<sub>3</sub>, 2-OCH<sub>3</sub>, 4-CH<sub>3</sub>, 3-CH<sub>3</sub>, 2-CH<sub>3</sub>, 4-Br, 3-Cl, 2-F

**[2.1] General procedure for the synthesis of Azidobenzenes<sup>1</sup> 1 (a-j):** A mixture of appropriate aniline (1 mmol) in 17 % HCl was stirred at 0 °C, aqueous sodium nitrite (1.5 mmol) was added dropwise and stirring continued at 0 °C. After 15 min, aqueous sodium azide (1.5 mmol) was added dropwise at 0 °C and contents stirred for 3 - 4 hours. The progress of the reaction was monitored by TLC [ethyl acetate / petroleum ether (1 : 5)]. After completion of reaction, it was extracted with ethyl acetate (3 x 50 mL). The combined ethyl acetate layer was dried over Na<sub>2</sub>SO<sub>4</sub>, concentrated under reduced pressure and used directly in the next step without any further purification.

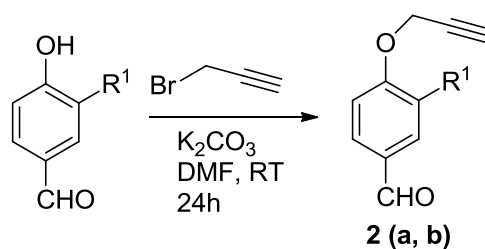

**[2.2] General procedure for the synthesis of 4-(prop-2-yn-1-yloxy)benzaldehydes<sup>2</sup> 2 (a, b):**

A mixture of appropriate hydroxy benzaldehyde (1 mmol) and propargyl bromide (1.2 mmol) in DMF as a solvent was stirred with  $\text{K}_2\text{CO}_3$  at room temperature for 20 – 24 hours. The progress of the reaction was monitored by TLC [ethyl acetate / petroleum ether (1 : 4)]. After completion of reaction, the mixture was poured into the ice/cold water & the solid product is separated, filtered out and dried. It was used directly in the next step without any further purification.

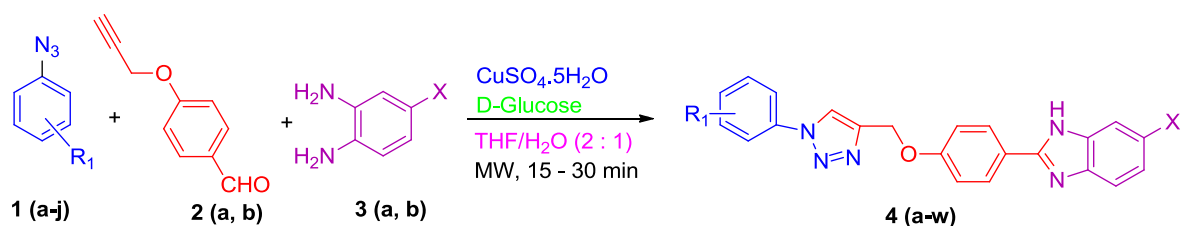

**[2.3] A typical procedure for the synthesis of 2-(4-((1-phenyl-1H-1,2,3-triazol-4-yl)methoxy)phenyl)-1H-benzo[d]imidazoles {4 (a-w)}:**

A mixture of appropriate alkyne aldehyde (500 mg, 3.1 mmol), appropriate azide (410 mg, 3.4 mmol), appropriate 1,2-diamino arene (405 mg, 3.7 mmol) in presence of  $\text{CuSO}_4$  (156 mg, 0.6 mmol), D-Glucose (225 mg, 1.2 mmol), in THF/ $\text{H}_2\text{O}$  (2 : 1) as a solvent was irradiated in microwave 70 °C, 100 watt/maximum power for 10 - 15 min. After the completion of reaction [monitored by TLC, methanol / chloroform (5 %)], and solvent was evaporated under reduced pressure. Residue was poured into water and the precipitate obtained was filtered. Precipitate was washed with chloroform (3 times) and pure product was obtained 4(a-w).

**References:**

- [1] Haridas, V.; Sahu, S.; Kumar, P. P. P. *Tetrahedron Lett.*, 2011, **52**, 6930-6934.  
 [2] (a) Pal, M.; Parasuraman, K.; Yeleswarapu, K. R. *Org. Lett.*, 2003, **5**, 349-352 (b) Bandaya, A. H.; Shameema, S. A.; Gupta, B. D.; Kumar, H. M. S. *Steroids*, 2010, **75**, 801-

804 (c) Beena.; Kumar, N.; Rohilla, R. K.; Roy, N.; Rawat, D. S. *Bio. Med. Chem. Lett.* **2009**, *19*, 1396-1398.

### 3. Analytical data:

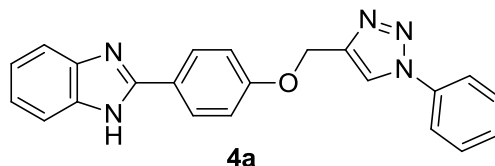

**[3.1] 2-(4-((1-phenyl-1H-1,2,3-triazol-4-yl)methoxy)phenyl)-1H-benzo[d]imidazole (4a) :**

It was obtained as light brown solid having m. p. 198.5 – 200.5 °C in 80 % yield, **IR** (KBr)  $\nu_{\max}$  (cm<sup>-1</sup>) = 3338, 1609 (C=C), 1263, 1044. **<sup>1</sup>H NMR (400 MHz, DMSO-*d*<sub>6</sub>)**  $\delta$  12.77 (s, 1H, -NH), 8.97 (s, 1H), 8.13 (d, *J* = 8.8 Hz, 2H), 7.91 (d, *J* = 8.8 Hz, 2H), 7.62-7.47 (m, 5H), 7.26 (d, *J* = 8.4 Hz, 2H), 7.16 (d, *J* = 1.4 Hz, 2H), 5.32 (s, 2H); **<sup>13</sup>C NMR (100 MHz, DMSO-*d*<sub>6</sub>)**  $\delta$  159.31, 151.24, 143.63, 136.55, 130.56, 129.90, 128.77, 128.04, 123.13, 123.01, 121.79, 120.18, 115.15, 61.16; **HRMS** calcd for C<sub>22</sub>H<sub>17</sub>N<sub>5</sub>OH: 368.1511; found [M+H]<sup>+</sup>: 368.1519.

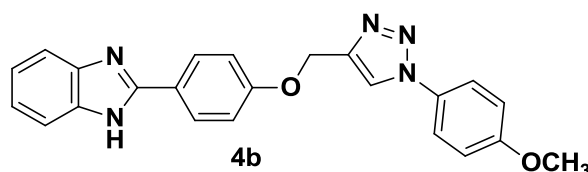

**[3.2] 2-(4-((1-(4-methoxyphenyl)-1H-1,2,3-triazol-4-yl)methoxy)phenyl)-1H-benzo[d]imidazole (4b) :**

It was obtained as light yellow solid having m. p. 237.0 - 239.0 °C in 92 % yield, **IR** (KBr)  $\nu_{\max}$  (cm<sup>-1</sup>) = 3221, 1612 (C=C), 1242, 1012. **<sup>1</sup>H NMR (400 MHz, DMSO-*d*<sub>6</sub>)**  $\delta$  12.74 (s, 1H, -NH), 8.87 (s, 1H), 8.13 (d, *J* = 8.8 Hz, 2H), 7.81 (d, *J* = 8.8 Hz, 2H), 7.26 (d, *J* = 7.32 Hz, 1H), 7.49 (d, *J* = 7.32 Hz, 1H), 7.25 (d, *J* = 8.8 Hz, 2H), 7.16-7.11 (m, 4H), 5.30 (s, 2H), 3.81 (s, 3H, -OCH<sub>3</sub>); **<sup>13</sup>C NMR (100 MHz, DMSO-*d*<sub>6</sub>)**  $\delta$  162.30, 159.34, 151.30, 143.39, 141.56, 131.99, 129.98, 128.07, 126.54, 125.20, 123.14, 122.97, 121.85, 119.22, 115.16, 114.88, 61.21, 55.53; **HRMS** calcd for C<sub>23</sub>H<sub>19</sub>N<sub>5</sub>O<sub>2</sub>H: 398.1617; found [M+H]<sup>+</sup>: 398.1621.

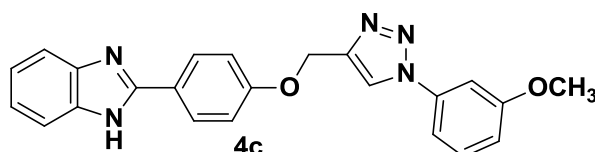

**[3.3]** **2-(4-((1-(3-methoxyphenyl)-1H-1,2,3-triazol-4-yl)methoxy)phenyl)-1H-benzo[d]imidazole (4c)** : It was obtained as light brown solid having m. p. 196.5-198.5 °C in 83 % yield, **IR** (KBr)  $\nu_{\max}$  (cm<sup>-1</sup>) = 3257, 1609 (C=C), 1244, 1006. **<sup>1</sup>H NMR (400 MHz, DMSO-*d*<sub>6</sub>)**  $\delta$  9.91 (s, 1H), 8.14 (d, *J* = 8.7 Hz, 2H), 7.60-7.48 (m, 5H), 7.25 (d, *J* = 8.7 Hz, 2H), 7.16 (d, *J* = 4.90 Hz, 2H), 7.06-7.03 (m, 1H), 7.49 (d, *J* = 7.32 Hz, 1H), 5.32 (s, 2H), 3.84 (s, 3H, -OCH<sub>3</sub>); **<sup>13</sup>C NMR (100 MHz, DMSO-*d*<sub>6</sub>)**  $\delta$  160.20, 159.31, 151.25, 143.59, 137.60, 130.87, 128.05, 123.14, 122.10, 121.50, 118.53, 115.16, 114.52, 112.12, 111.07, 105.77, 61.18, 55.62; **HRMS** calcd for C<sub>23</sub>H<sub>19</sub>N<sub>5</sub>O<sub>2</sub>H: 398.1617; found [M+H]<sup>+</sup>: 398.1627.

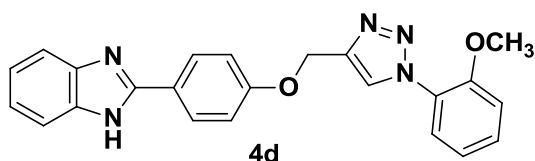

**[3.4]** **2-(4-((1-(2-methoxyphenyl)-1H-1,2,3-triazol-4-yl)methoxy)phenyl)-1H-benzo[d]imidazole (4d)** : It was obtained as brown solid having m. p. 234.0-236.0 °C in 75 % yield, **IR** (KBr)  $\nu_{\max}$  (cm<sup>-1</sup>) = 3197, 1609 (C=C), 1255, 1048. **<sup>1</sup>H NMR (400 MHz, DMSO-*d*<sub>6</sub>)**  $\delta$  12.82 (s, 1H, -NH), 8.63 (s, 1H), 8.14 (d, *J* = 8.8 Hz, 2H), 7.65-7.48 (m, 4H), 7.33 (d, *J* = 7.32 Hz, 1H), 7.27 (d, *J* = 8.8 Hz, 2H), 7.18-7.12 (m, 3H), 5.31 (s, 2H), 3.85 (s, 3H, -OCH<sub>3</sub>); **<sup>13</sup>C NMR (100 MHz, DMSO-*d*<sub>6</sub>)**  $\delta$  159.38, 151.66, 143.87, 130.85, 128.01, 126.82, 125.84, 125.59, 123.06, 122.12, 121.47, 120.89, 118.53, 115.15, 113.01, 111.05, 61.04, 56.12; **HRMS** calcd for C<sub>23</sub>H<sub>19</sub>N<sub>5</sub>O<sub>2</sub>H: 398.1617; found [M+H]<sup>+</sup>: 398.1598.

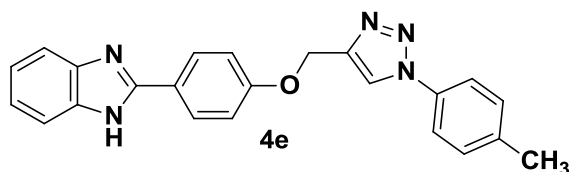

**[3.5]** **2-(4-((1-(*p*-tolyl)-1H-1,2,3-triazol-4-yl)methoxy)phenyl)-1H-benzo[d]imidazole (4e)** : It was obtained as yellow solid having m. p. 190.0-192.0 °C in 79 % yield, **IR** (KBr)  $\nu_{\max}$  (cm<sup>-1</sup>) = 3309, 1609 (C=C), 1245, 1013. **<sup>1</sup>H NMR (400 MHz, DMSO-*d*<sub>6</sub>)**  $\delta$  8.94 (s, 1H), 8.17 (br. s, 2H), 7.79 (d, *J* = 8.08 Hz, 2H), 7.66 (br. s, 2H), 7.40 (d, *J* = 8.08 Hz, 2H), 7.29 (m, 4H), 5.33 (s, 2H), 2.36 (s, 3H, -CH<sub>3</sub>); **<sup>13</sup>C NMR (100 MHz, DMSO-*d*<sub>6</sub>)**  $\delta$  160.08, 143.33, 134.24, 130.23, 128.59, 123.04, 120.82, 115.37, 114.60, 61.20, 20.53; **HRMS** calcd for C<sub>23</sub>H<sub>19</sub>N<sub>5</sub>O<sub>2</sub>H: 382.1667; found [M+H]<sup>+</sup>: 382.1672.

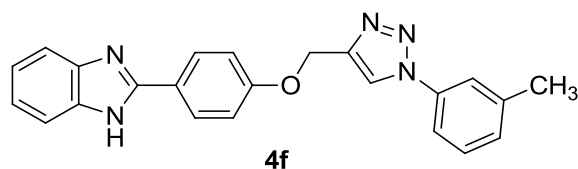

**[3.6]** 2-(4-((1-(*m*-tolyl)-1*H*-1,2,3-triazol-4-yl)methoxy)phenyl)-1*H*-benzo[*d*]imidazole (**4f**) : It was obtained as brown solid having m. p. 176.5.0-178.5 °C in 71 % yield, **IR** (KBr)  $\nu_{\max}$  (cm<sup>-1</sup>) = 3104, 1609 (C=C), 1263, 1046. **<sup>1</sup>H NMR** (400 MHz, DMSO-*d*<sub>6</sub>)  $\delta$  8.96 (s, 1H), 8.18 (s, 2H), 7.76-7.48 (m, 5H), 7.31-7.21 (m, 5H), 5.34 (s, 2H), 2.42 (s, 3H, -CH<sub>3</sub>); **<sup>13</sup>C NMR** (100 MHz, DMSO-*d*<sub>6</sub>)  $\delta$  160.02, 143.44, 139.67, 136.47, 129.69, 129.37, 128.58, 123.51, 122.92, 120.57, 117.23, 116.11, 115.37, 114.59, 61.22, 20.88; **HRMS** calcd for C<sub>23</sub>H<sub>19</sub>N<sub>5</sub>OH: 382.1667; found [M+H]<sup>+</sup>: 382.1672.

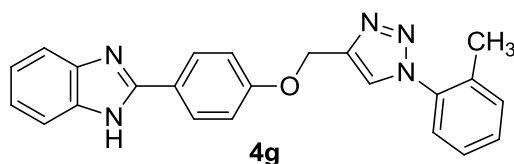

**[3.7]** 2-(4-((1-(*o*-tolyl)-1*H*-1,2,3-triazol-4-yl)methoxy)phenyl)-1*H*-benzo[*d*]imidazole (**4g**) : It was obtained as yellow solid having m. p. 260.0-262.0 °C in 60 % yield, **IR** (KBr)  $\nu_{\max}$  (cm<sup>-1</sup>) = 3295, 1607 (C=C), 1247, 1050. **<sup>1</sup>H NMR** (400 MHz, DMSO-*d*<sub>6</sub>)  $\delta$  13.91 (br s, 1H, -NH), 8.65 (s, 1H), 8.17 (br s, 2H), 7.64-7.11 (m, 10H), 5.31 (s, 2H), 2.13 (s, 3H, -CH<sub>3</sub>); **<sup>13</sup>C NMR** (100 MHz, DMSO-*d*<sub>6</sub>)  $\delta$  159.91, 153.60, 145.59, 142.42, 140.34, 136.18, 133.06, 131.37, 129.89, 128.69, 127.05, 126.49, 126.01, 122.72, 115.28, 113.51, 61.18, 17.29; **HRMS** calcd for C<sub>23</sub>H<sub>19</sub>N<sub>5</sub>OH: 382.1667; found [M+H]<sup>+</sup>: 382.1659.

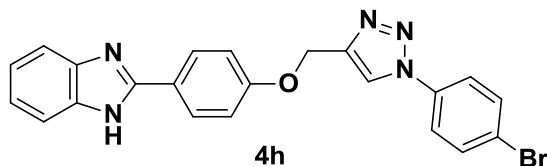

**[3.8]** 2-(4-((1-(4-bromophenyl)-1*H*-1,2,3-triazol-4-yl)methoxy)phenyl)-1*H*-benzo[*d*]imidazole (**4h**) : It was obtained as brown solid having m. p. 176.5-178.5 °C in 75 % yield, **IR** (KBr)  $\nu_{\max}$  (cm<sup>-1</sup>) = 3316, 1608 (C=C), 1245, 1014. **<sup>1</sup>H NMR** (400 MHz, DMSO-*d*<sub>6</sub>)  $\delta$  9.04 (s, 1H), 8.16 (d, *J* = 8.8 Hz, 2H), 7.91-7.80 (m, 4H), 7.65 (m, 2H), 7.33-7.31 (m, 4H), 5.36 (s, 2H); **<sup>13</sup>C NMR** (100 MHz, DMSO-*d*<sub>6</sub>)  $\delta$  160.27, 143.67, 135.75,

132.87, 128.81, 123.35, 123.20, 122.15, 121.53, 115.51, 114.47, 61.23; **HRMS** calcd for  $C_{22}H_{16}BrN_5OH$ : 446.0616; found  $[M+H]^+$ : 346.0622.

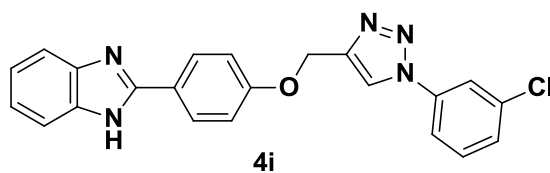

**[3.9]** **2-(4-((1-(3-chlorophenyl)-1H-1,2,3-triazol-4-yl)methoxy)phenyl)-1H-benzo[d]imidazole (4i)** : It was obtained as light brown solid having m. p. 172.0-174.0 °C in 73 % yield, **IR** (KBr)  $\nu_{max}$  ( $cm^{-1}$ ) = 3245, 1596 (C=C), 1254, 1047.  **$^1H$  NMR (400 MHz, DMSO- $d_6$ )**  $\delta$  9.07 (s, 1H), 8.16 (d,  $J$  = 8.08 Hz, 2H), 8.06 (d,  $J$  = 8.08 Hz, 1H), 7.94 (d,  $J$  = 8.04 Hz, 2H), 7.65-7.56 (m, 4H), 7.29-7.24 (m, 4H), 5.35 (s, 2H);  **$^{13}C$  NMR (100 MHz, DMSO- $d_6$ )**  $\delta$  159.73, 143.72, 137.55, 134.20, 131.67, 128.62, 128.33, 123.26, 122.54, 119.98, 118.78, 115.31, 114.67, 61.15; **HRMS** calcd for  $C_{22}H_{16}ClN_5OH$ : 402.1121; found  $[M+H]^+$ : 402.1119.

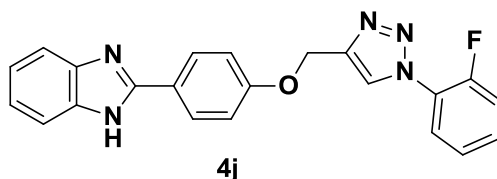

**[3.10]** **2-(4-((1-(2-fluorophenyl)-1H-1,2,3-triazol-4-yl)methoxy)phenyl)-1H-benzo[d]imidazole (4j)** : It was obtained as dark brown solid having m. p. 160.0-162.0 °C in 65 % yield, **IR** (KBr)  $\nu_{max}$  ( $cm^{-1}$ ) = 3403, 1611 (C=C), 1262, 1044.  **$^1H$  NMR (400 MHz, DMSO- $d_6$ )**  $\delta$  8.79 (d,  $J$  = 1.3 Hz, 1H), 8.17 (br. s, 2H), 7.87 (m, 1H), 7.62-7.55 (m, 4H), 7.46 (t, 1H), 7.28-7.24 (m, 4H), 5.35 (s, 2H);  **$^{13}C$  NMR (100 MHz, DMSO- $d_6$ )**  $\delta$  162.56, 159.46, 151.98, 143.47, 140.91, 137.34, 133.98, 131.44, 128.81, 128.12, 123.26, 122.26, 119.76, 118.39, 115.20, 113.75, 60.87 ; **HRMS** calcd for  $C_{22}H_{16}FN_5OH$ : 386.1617; found  $[M+H]^+$ : 386.1421.

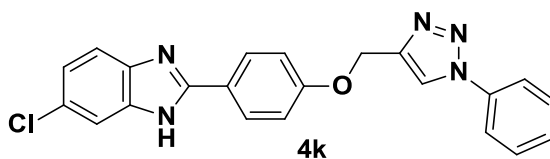

**[3.11]** **6-chloro-2-(4-((1-phenyl-1H-1,2,3-triazol-4-yl)methoxy)phenyl)-1H-benzo[d]imidazole (4k)** : It was obtained as light brown solid having m. p. 261.0-263.0 °C in

90 % yield, **IR** (KBr)  $\nu_{\max}$  (cm<sup>-1</sup>) = 3231, 1608 (C=C), 1251, 1060. **<sup>1</sup>H NMR (400 MHz, DMSO-*d*<sub>6</sub>)**  $\delta$  8.99 (s, 1H), 8.13 (d, *J* = 8.79 Hz, 2H), 7.91 (d, *J* = 7.32 Hz, 2H), 7.61-7.55 (m, 4H), 7.51-7.47 (m, 1H), 7.27 (d, *J* = 8.79 Hz, 2H), 7.21-7.19 (dd, *J* = 8.79 Hz & 2.20 Hz, 1H), 5.33 (s, 2H); **<sup>13</sup>C NMR (100 MHz, DMSO-*d*<sub>6</sub>)**  $\delta$  159.78, 152.54, 143.58, 136.57, 129.98, 128.86, 128.40, 126.41, 123.11, 122.35, 122.09, 122.07, 120.22, 115.32, 114.65, 61.21; **HRMS** calcd for C<sub>22</sub>H<sub>16</sub>ClN<sub>5</sub>O<sub>2</sub>H: 402.1122; found [M+H]<sup>+</sup>: 402.1129.

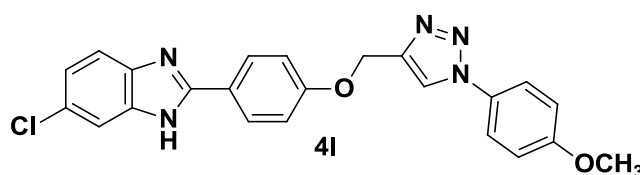

**[3.12] 6-chloro-2-(4-((1-(4-methoxyphenyl)-1H-1,2,3-triazol-4-yl)methoxy)phenyl)-1H-benzo[*d*]imidazole (4l)** : It was obtained as green solid having m. p. 227 – 229 °C in 91 % yield, **IR** (KBr)  $\nu_{\max}$  (cm<sup>-1</sup>) = 3228, 1615 (C=C), 1246, 1055. **<sup>1</sup>H NMR (400 MHz, DMSO-*d*<sub>6</sub>)**  $\delta$  8.86 (s, 1H), 8.12 (d, *J* = 8.70 Hz, 2H), 7.81-7.78 (m, 2H), 7.60 (d, *J* = 1.37 Hz, 1H), 7.456 (d, *J* = 8.24 Hz, 1H), 7.13-7.11 (m, 2H), 5.30 (s, 2H); 3.81 (s, 3H, -OCH<sub>3</sub>); **<sup>13</sup>C NMR (100 MHz, DMSO-*d*<sub>6</sub>)**  $\delta$  159.73, 159.35, 143.31, 129.96, 128.32, 126.29, 123.05, 122.23, 121.87, 115.27, 114.48, 61.21, 55.58; **HRMS** calcd for C<sub>23</sub>H<sub>18</sub>ClN<sub>5</sub>O<sub>2</sub>H: 432.1227; found [M+H]<sup>+</sup>: 432.1219.

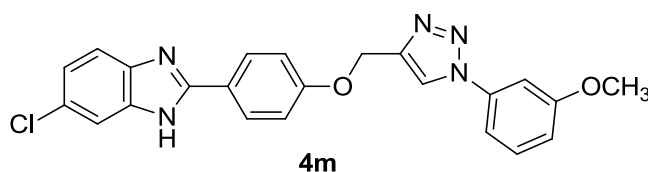

**[3.13] 6-chloro-2-(4-((1-(3-methoxyphenyl)-1H-1,2,3-triazol-4-yl)methoxy)phenyl)-1H-benzo[*d*]imidazole (4m)**: It was obtained as dark brown solid having m. p. 195.0-196.0 °C in 73 % yield, **IR** (KBr)  $\nu_{\max}$  (cm<sup>-1</sup>) = 3310, 1609 (C=C), 1275, 1027. **<sup>1</sup>H NMR (400 MHz, DMSO-*d*<sub>6</sub>)**  $\delta$  9.02 (s, 1H), 8.13 (d, *J* = 8.79 Hz, 2H), 7.61-7.56 (m, 3H), 7.50-7.48 (m, 3H), 7.28 (d, *J* = 8.79 Hz, 2H), 7.22-7.20 (dd, *J* = 8.05 Hz & 1.46 Hz, 1H), 5.33 (s, 2H), 3.84 (s, 3H, -OCH<sub>3</sub>); **<sup>13</sup>C NMR (100 MHz, DMSO-*d*<sub>6</sub>)**  $\delta$  160.20, 159.79, 143.50, 137.58, 130.89, 128.40, 126.43, 123.19, 122.38, 115.31, 114.46, 112.12, 105.78, 61.21, 55.63; **HRMS** calcd for C<sub>23</sub>H<sub>18</sub>ClN<sub>5</sub>O<sub>2</sub>H: 432.1227; found [M+H]<sup>+</sup>: 432.1221.



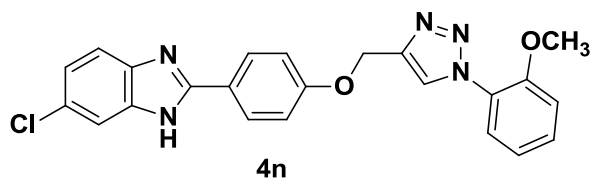

**[3.14]** **6-chloro-2-(4-((1-(2-methoxyphenyl)-1H-1,2,3-triazol-4-yl)methoxy)phenyl)-1H-benzo[d]imidazole (4n)** : It was obtained as green solid, having m. p. 168.0-170.0 °C in 81 % yield, IR (KBr)  $\nu_{\max}$  (cm<sup>-1</sup>) = 3245, 1608 (C=C), 1266, 1049. <sup>1</sup>H NMR (400 MHz, DMSO-*d*<sub>6</sub>)  $\delta$  8.63 (s, 1H), 8.15 (br. s, 2H), 7.66-7.52 (m, 3H), 7.32-7.22 (m, 5H), 7.18 (m, 1H), 5.32 (s, 2H); 3.84 (s, 3H, -OCH<sub>3</sub>); <sup>13</sup>C NMR (100 MHz, DMSO-*d*<sub>6</sub>)  $\delta$  159.67, 151.54, 130.75, 128.22, 125.72, 120.78, 115.19, 112.89, 60.80, 56.01; HRMS calcd for C<sub>23</sub>H<sub>18</sub>ClN<sub>5</sub>O<sub>2</sub>H: 432.1227; found [M+H]<sup>+</sup>: 432.1221.

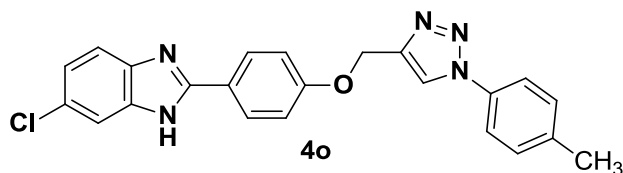

**[3.15]** **6-chloro-2-(4-((1-(*p*-tolyl)-1H-1,2,3-triazol-4-yl)methoxy)phenyl)-1H-benzo[d]imidazole (4o)** : It was obtained as green solid having m. p. 196.5-198.5 °C in 82 % yield, IR (KBr)  $\nu_{\max}$  (cm<sup>-1</sup>) = 3231, 1608 (C=C), 1250, 1059. <sup>1</sup>H NMR (400 MHz, DMSO-*d*<sub>6</sub>)  $\delta$  8.93 (s, 1H), 8.13 (d, *J* = 8.05 Hz, 2H), 7.78 (d, *J* = 8.05 Hz, 2H), 7.63 (s, 1H), 7.59 (d, *J* = 8.05 Hz, 1H), 7.39 (d, *J* = 8.05 Hz, 2H), 7.28 (d, *J* = 8.05 Hz, 2H), 7.23 (d, *J* = 8.05 Hz, 1H), 5.32 (s, 2H), 2.36 (s, 3H, -CH<sub>3</sub>); <sup>13</sup>C NMR (100 MHz, DMSO-*d*<sub>6</sub>)  $\delta$  159.84, 143.63, 138.43, 134.27, 130.24, 128.39, 126.51, 122.94, 122.46, 120.02, 115.28, 61.18, 20.54; HRMS calcd for C<sub>23</sub>H<sub>18</sub>ClN<sub>5</sub>OH: 416.1278; found [M+H]<sup>+</sup>: 416.1269.

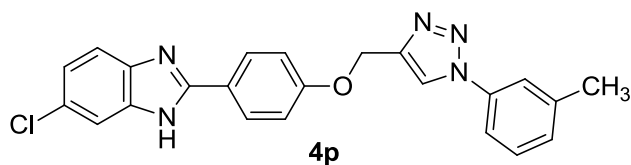

**[3.16]** **6-chloro-2-(4-((1-(*m*-tolyl)-1H-1,2,3-triazol-4-yl)methoxy)phenyl)-1H-benzo[d]imidazole (4p)** : It was obtained as green solid having m. p. 179.5-181.5 °C in 69 % yield, IR (KBr)  $\nu_{\max}$  (cm<sup>-1</sup>) = 3222, 1611 (C=C), 1250, 1058. <sup>1</sup>H NMR (400 MHz, DMSO-*d*<sub>6</sub>)  $\delta$  8.96 (s, 1H), 8.14 (d, *J* = 8.8 Hz, 2H), 7.75 (s, 1H), 7.70 (d, *J* = 8.04 Hz, 1H), 7.62-7.57 (m, 2H), 7.49 (t, *J* = 8.76 Hz, 1H), 7.31-7.19 (m, 4H), 5.33 (s, 2H), 2.38 (s, 3H, -CH<sub>3</sub>); <sup>13</sup>C

**NMR (100 MHz, DMSO-*d*<sub>6</sub>)**  $\delta$  159.74, 143.50, 139.73, 136.51, 129.75, 129.43, 128.40, 126.40, 123.03, 122.33, 120.62, 117.28, 115.86, 115.2961.21, 20.93; **HRMS** calcd for C<sub>23</sub>H<sub>18</sub>ClN<sub>5</sub>OH: 416.1278; found [M+H]<sup>+</sup>: 416.1270.

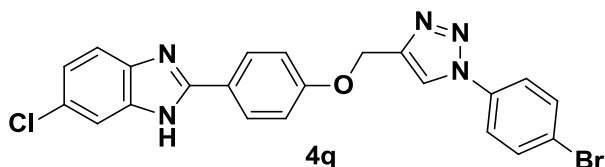

**[3.17]** **2-(4-((1-(4-bromophenyl)-1H-1,2,3-triazol-4-yl)methoxy)phenyl)-6-chloro-1H-benzo[d]imidazole (4q)** : It was obtained as brown solid having m. p. 246.5-248.5 °C in 78 % yield, **IR** (KBr)  $\nu_{\max}$  (cm<sup>-1</sup>) = 3220, 1610 (C=C), 1249, 1057. **<sup>1</sup>H NMR (400 MHz, DMSO-*d*<sub>6</sub>)**  $\delta$  9.01 (s, 1H), 8.13 (d, *J* = 8.79 Hz, 2H), 7.90 (d, *J* = 8.79 Hz, 2H), 7.81 (d, *J* = 8.79 Hz, 2H), 7.65 (m, 1H), 7.58 (d, *J* = 8.05 Hz, 1H), 7.27 (d, *J* = 8.79 Hz, 2H), 7.23 (dd, *J* = 8.79 Hz & 1.46 Hz, 2H), 5.33 (s, 2H); **<sup>13</sup>C NMR (100 MHz, DMSO-*d*<sub>6</sub>)**  $\delta$  159.80, 143.75, 135.75, 132.84, 128.42, 126.50, 123.13, 122.44, 122.12, 121.94, 121.50, 115.31, 61.16; **HRMS** calcd for C<sub>22</sub>H<sub>15</sub>BrClN<sub>5</sub>OH: 480.0227; found [M+H]<sup>+</sup>: 480.0213.

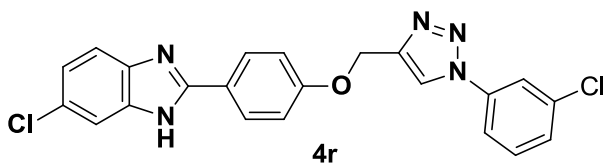

**[3.18]** **6-chloro-2-(4-((1-(3-chlorophenyl)-1H-1,2,3-triazol-4-yl)methoxy)phenyl)-1H-benzo[d]imidazole (4r)** : It was obtained as dark brown solid having m. p. 209.0-211.0 °C in 77 % yield, **IR** (KBr)  $\nu_{\max}$  (cm<sup>-1</sup>) = 3234, 1596 (C=C), 1252, 1061. **<sup>1</sup>H NMR (400 MHz, DMSO-*d*<sub>6</sub>)**  $\delta$  9.06 (s, 1H), 8.13 (d, *J* = 8.05 Hz, 2H), 8.06 (m, 1H), 7.94 (d, *J* = 8.79 Hz, 1H), 7.64-7.55 (m, 4H), 7.27 (d, *J* = 8.05 Hz, 2H), 7.21 (d, *J* = 8.79 Hz, 1H), 5.33 (s, 2H); **<sup>13</sup>C NMR (100 MHz, DMSO-*d*<sub>6</sub>)**  $\delta$  159.73, 143.72, 137.53, 134.23, 131.67, 128.62, 128.34, 126.35, 123.25, 122.29, 119.98, 118.78, 115.29, 61.15; **HRMS** calcd for C<sub>22</sub>H<sub>15</sub>Cl<sub>2</sub>N<sub>5</sub>OH: 436.0732; found [M+H]<sup>+</sup>: 436.0729.

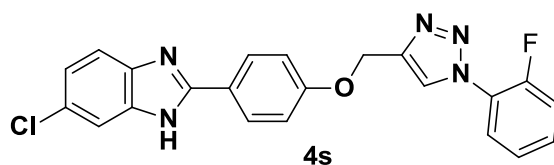

**[3.19]** **6-chloro-2-(4-((1-(2-fluorophenyl)-1H-1,2,3-triazol-4-yl)methoxy)phenyl)-1H-benzo[d]imidazole (4s)** : It was obtained as green solid having m. p. 179.0-181.0 °C in 69 % yield, IR (KBr)  $\nu_{\max}$  (cm<sup>-1</sup>) = 3219, 1607 (C=C), 1259, 1057. <sup>1</sup>H NMR (400 MHz, DMSO-*d*<sub>6</sub>)  $\delta$  8.79 (d, *J* = 2.2 Hz, 1H), 8.14 (d, *J* = 8.79 Hz, 2H), 7.87-7.83 (m, 1H), 7.64-7.56 (m, 4H), 7.46-7.42 (m, 1H), 7.30 (d, *J* = 8.79 Hz, 2H), 7.25-7.22 (dd, *J* = 8.79 Hz & 1.46 Hz, 1H), 5.35 (s, 2H); <sup>13</sup>C NMR (100 MHz, DMSO-*d*<sub>6</sub>)  $\delta$  159.90, 155.09, 152.60, 142.97, 131.39, 128.44, 126.60, 126.44, 126.04, 125.58, 122.55, 117.24, 117.05, 1115.30, 60.96; HRMS calcd for C<sub>22</sub>H<sub>15</sub>ClFN<sub>5</sub>OH: 420.1027; found [M+H]<sup>+</sup>: 420.1021.

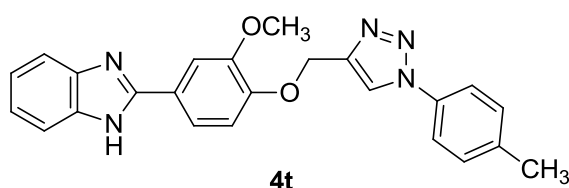

**[3.20]** **2-(3-methoxy-4-((1-(p-tolyl)-1H-1,2,3-triazol-4-yl)methoxy)phenyl)-1H-benzo[d]imidazole (4t)** : It was obtained as dark brown solid having m. p. 193.5-195.5 °C in 69 % yield, IR (KBr)  $\nu_{\max}$  (cm<sup>-1</sup>) = 3386, 1605 (C=C), 1273, 1045. <sup>1</sup>H NMR (400 MHz, DMSO-*d*<sub>6</sub>)  $\delta$  8.93 (s, 1H), 7.79 (d, *J* = 8.05 Hz, 4H), 7.64 (s, 2H), 7.40 (d, *J* = 8.79 Hz, 3H), 7.25 (s, 2H), 5.30 (s, 2H), 3.86 (s, 3H, -OCH<sub>3</sub>), 2.37 (s, 3H, -CH<sub>3</sub>); <sup>13</sup>C NMR (100 MHz, DMSO-*d*<sub>6</sub>)  $\delta$  149.20, 143.36, 138.49, 134.32, 130.29, 123.16, 122.65, 120.08, 119.68, 113.52, 110.17, 61.58, 55.63, 20.60; HRMS calcd for C<sub>24</sub>H<sub>21</sub>N<sub>5</sub>O<sub>2</sub>H: 412.1773; found [M+H]<sup>+</sup>: 412.1767.

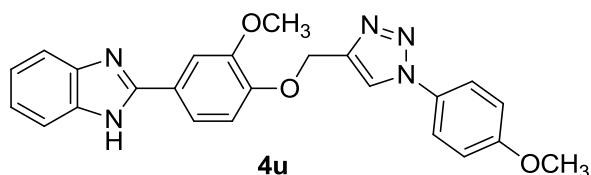

**[3.21]** **2-(3-methoxy-4-((1-(4-methoxyphenyl)-1H-1,2,3-triazol-4-yl)methoxy)phenyl)-1H-benzo[d]imidazole (4u)** : It was obtained as dark brown solid having m. p. 191.0-193.0 °C in 89 % yield, IR (KBr)  $\nu_{\max}$  (cm<sup>-1</sup>) = 3385, 1616 (C=C), 1262, 1050. <sup>1</sup>H NMR (400 MHz, DMSO-*d*<sub>6</sub>)  $\delta$  8.81 (s, 1H), 7.79-7.76 (m, 3H), 7.52 (s, 2H), 7.32 (d, *J* = 8.54 Hz, 2H), 7.14-7.09 (m, 4H), 5.25 (s, 2H), 3.84 (s, 3H, -OCH<sub>3</sub>), 3.79 (s, 3H, -OCH<sub>3</sub>), 2.37; <sup>13</sup>C NMR (100 MHz, DMSO-*d*<sub>6</sub>)  $\delta$  159.35, 149.20, 129.94, 123.21, 122.67, 121.87, 114.91, 114.65, 113.53, 61.58, 55.57; HRMS calcd for C<sub>24</sub>H<sub>21</sub>N<sub>5</sub>O<sub>3</sub>H: 428.1722; found [M+H]<sup>+</sup>: 428.1728.

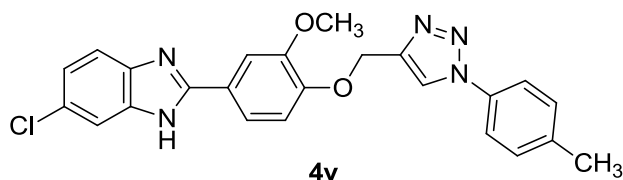

**[3.22]** **6-chloro-2-(3-methoxy-4-((1-(p-tolyl)-1H-1,2,3-triazol-4-yl)methoxy)phenyl)-1H-benzo[d]imidazole (4v)** : It was obtained as green solid having m. p. 173.5-175.5 °C in 68 % yield, **IR** (KBr)  $\nu_{\max}$  (cm<sup>-1</sup>) = 3148, 1608 (C=C), 1272, 1059. **<sup>1</sup>H NMR (400 MHz, DMSO-*d*<sub>6</sub>)**  $\delta$  8.92 (s, 1H), 7.79 (d, *J* = 8.05 Hz, 4H), 7.65 (s, 1H), 7.61 (d, *J* = 7.32 Hz, 1H), 7.40 (d, *J* = 8.05 Hz, 3H), 7.24 (d, *J* = 8.05 Hz, 1H), 5.29 (s, 2H), 3.87 (s, 3H, -OCH<sub>3</sub>), 2.36 (s, 3H, -CH<sub>3</sub>); **<sup>13</sup>C NMR (100 MHz, DMSO-*d*<sub>6</sub>)**  $\delta$  149.09, 138.39, 134.20, 130.18, 126.43, 123.08, 119.98, 113.40, 109.79, 61.45, 55.53, 20.48; **HRMS** calcd for C<sub>24</sub>H<sub>20</sub>ClN<sub>5</sub>O<sub>2</sub>H: 446.1383; found [M+H]<sup>+</sup>: 446.1370.

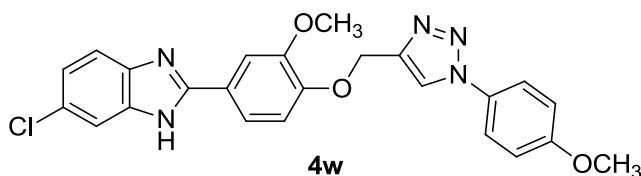

**[3.23]** **6-chloro-2-(3-methoxy-4-((1-(4-methoxyphenyl)-1H-1,2,3-triazol-4-yl)methoxy)phenyl)-1H-benzo[d]imidazole (4w)** : It was obtained as dark brown solid having m. p. 187.6-189.6 °C in 85 % yield, **IR** (KBr)  $\nu_{\max}$  (cm<sup>-1</sup>) = 3199, 1611 (C=C), 1259, 1059. **<sup>1</sup>H NMR (400 MHz, DMSO-*d*<sub>6</sub>)**  $\delta$  8.86 (s, 1H), 7.82-7.73 (m, 4H), 7.26 (s, 1H), 7.59 (d, *J* = 8.05 Hz, 1H), 7.39 (d, *J* = 8.05 Hz, 1H), 7.21 (d, *J* = 8.05 Hz, 1H), 7.14 (d, *J* = 8.76 Hz, 2H), 5.28 (s, 2H), 3.86 (s, 3H, -OCH<sub>3</sub>), 3.82 (s, 3H, -OCH<sub>3</sub>); **<sup>13</sup>C NMR (100 MHz, DMSO-*d*<sub>6</sub>)**  $\delta$  159.33, 149.30, 149.15, 129.94, 126.33, 123.20, 122.26, 121.85, 119.49, 114.88, 113.46, 110.02, 61.57, 55.55; **HRMS** calcd for C<sub>24</sub>H<sub>20</sub>ClN<sub>5</sub>O<sub>3</sub>H: 462.1332; found [M+H]<sup>+</sup>: 462.1356.

#### 4. Copies of NMR spectra for new compound:

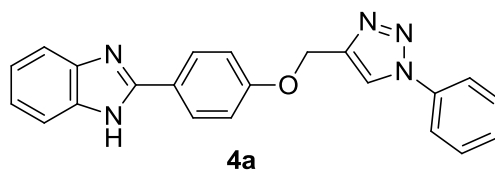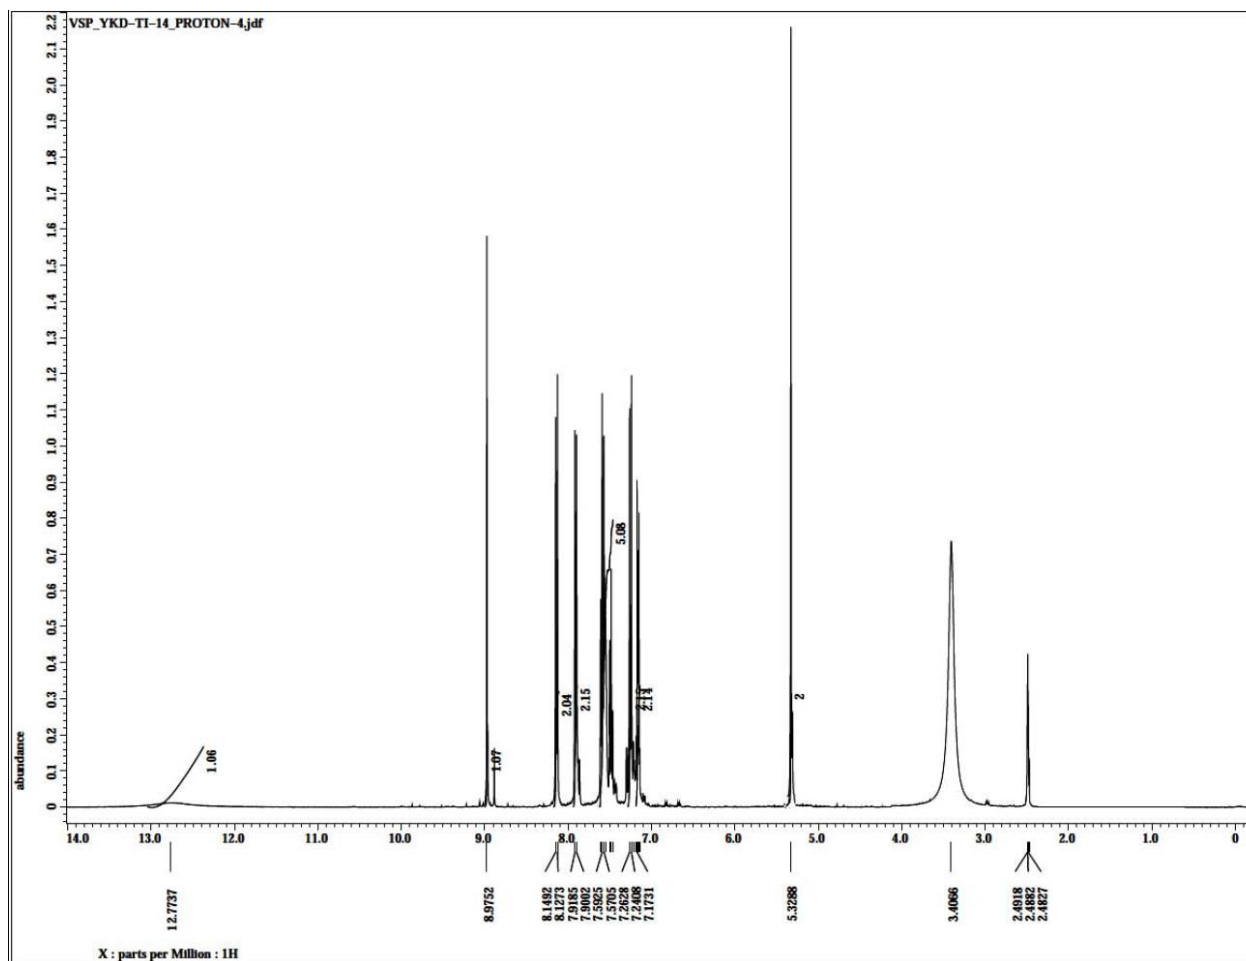

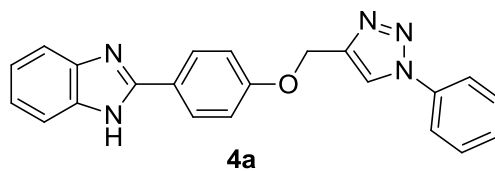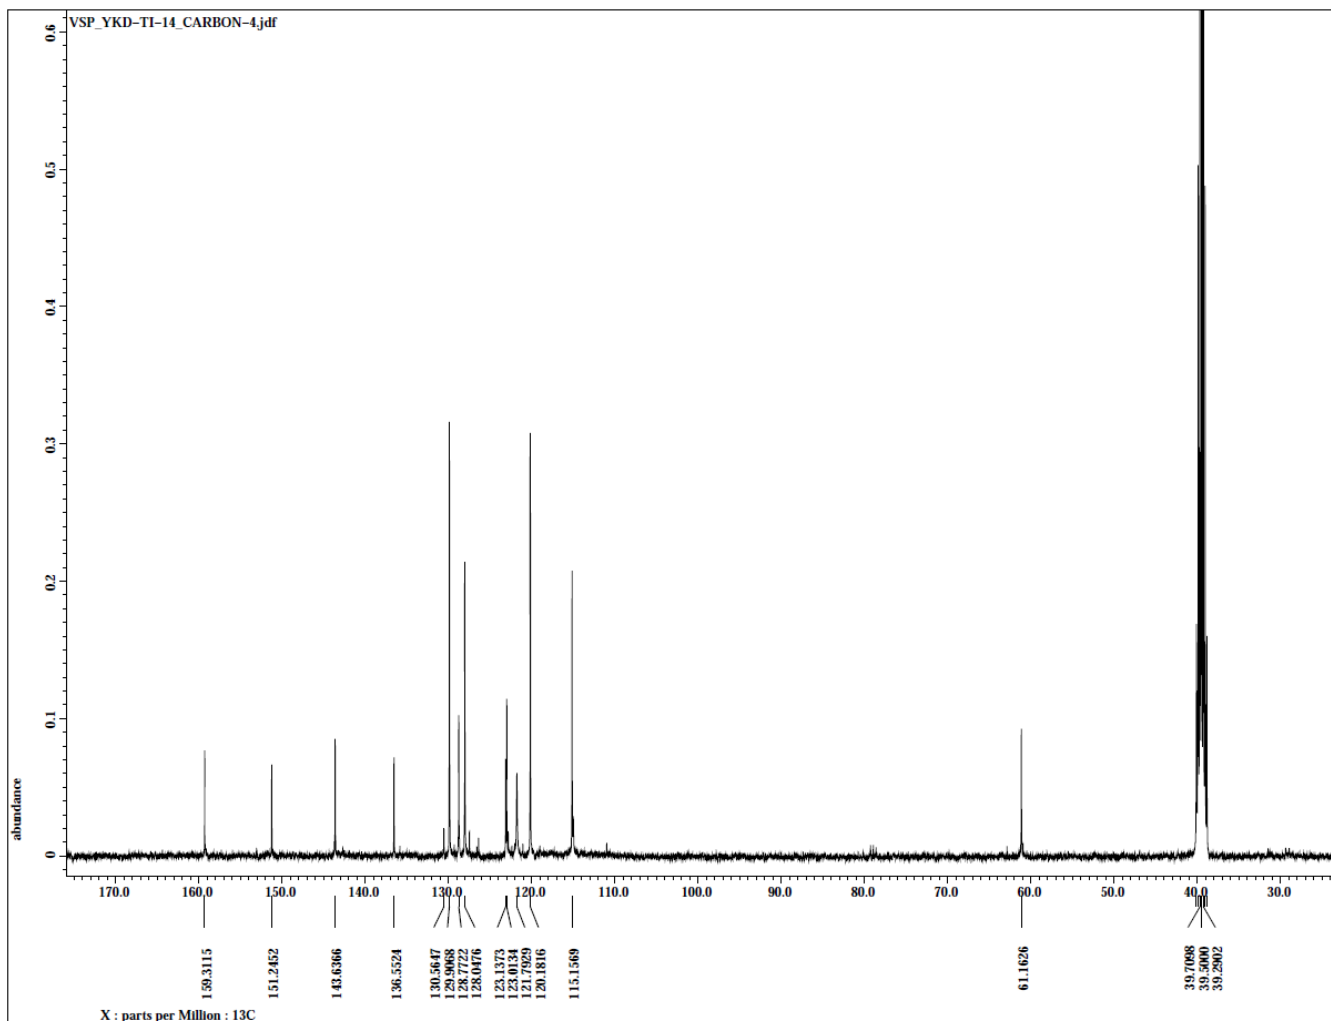

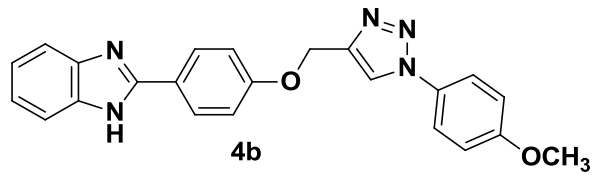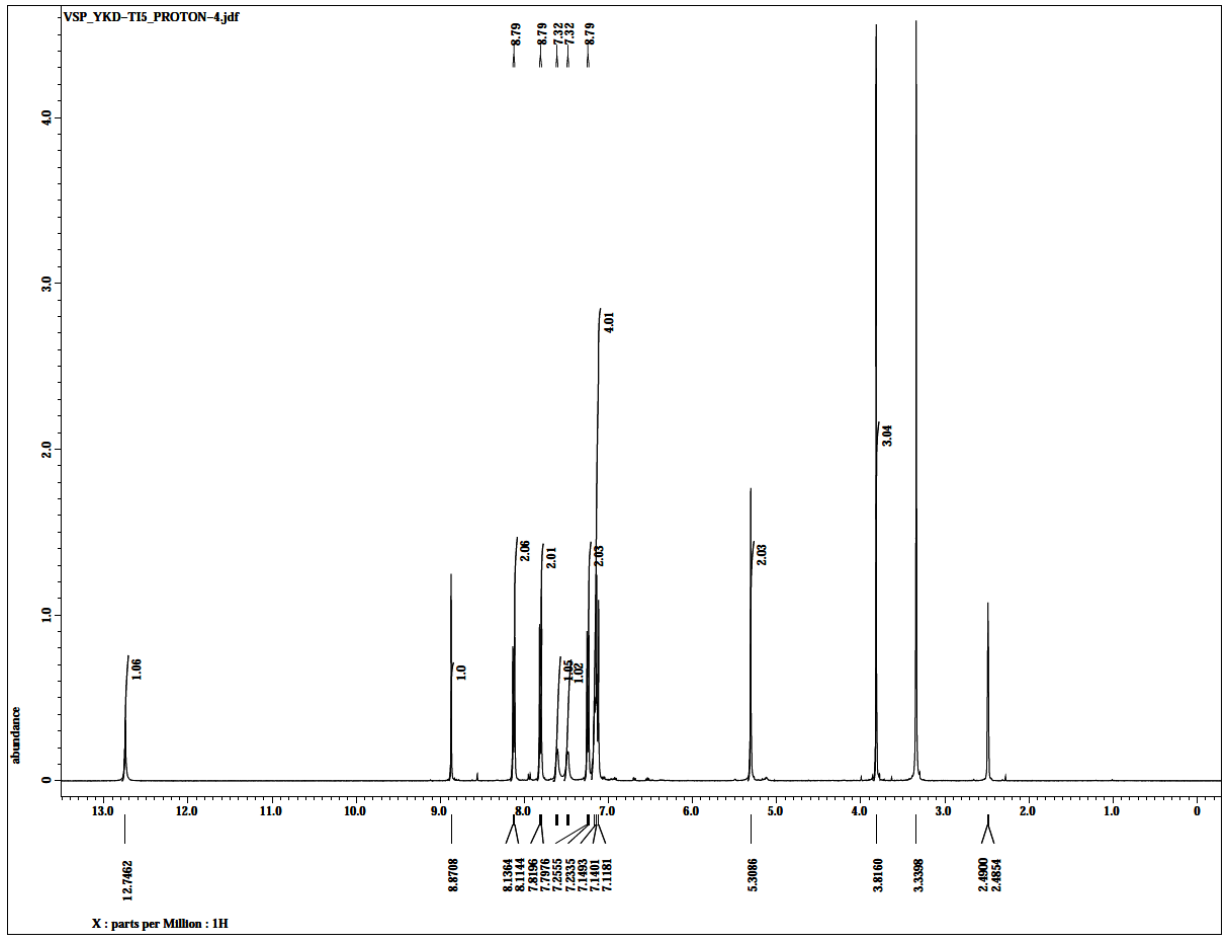

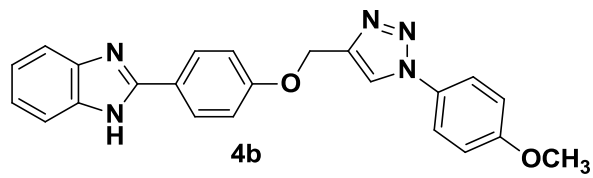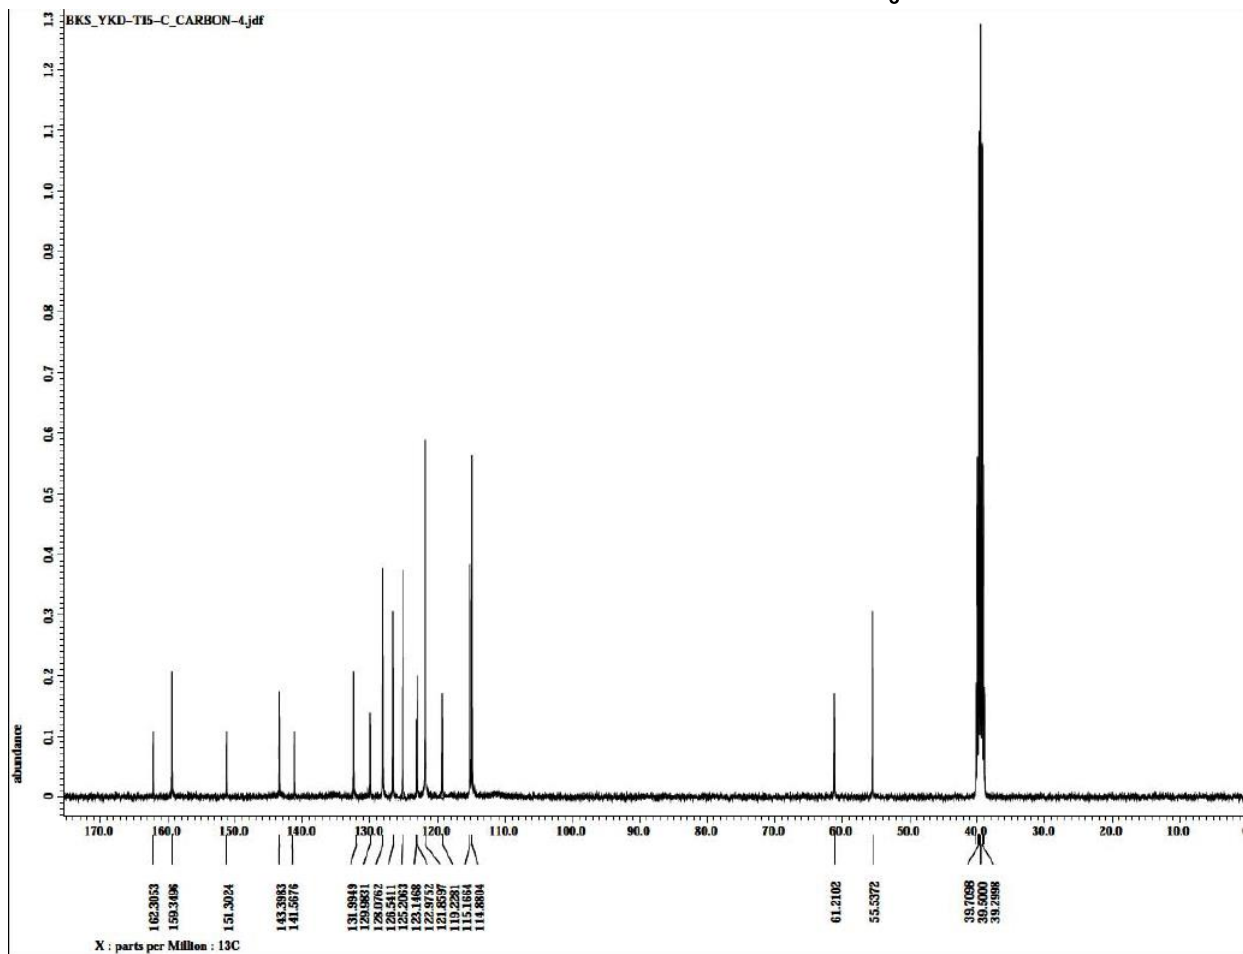



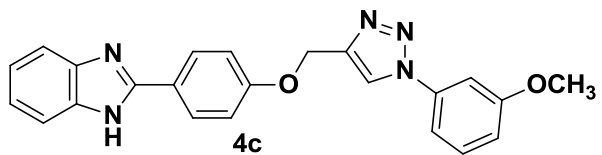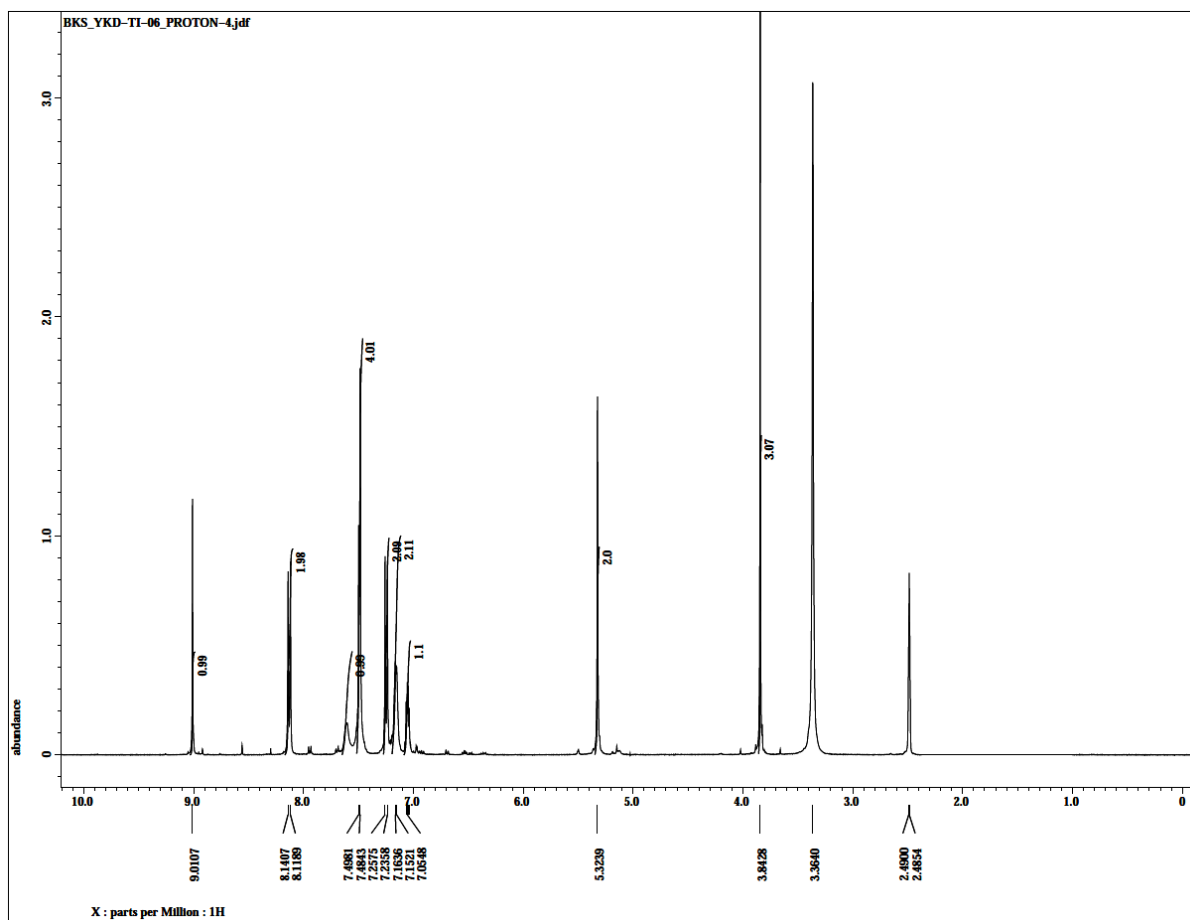

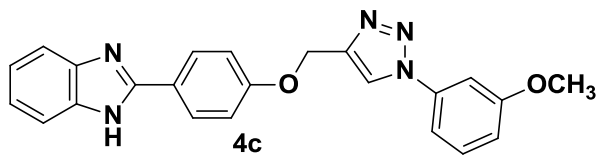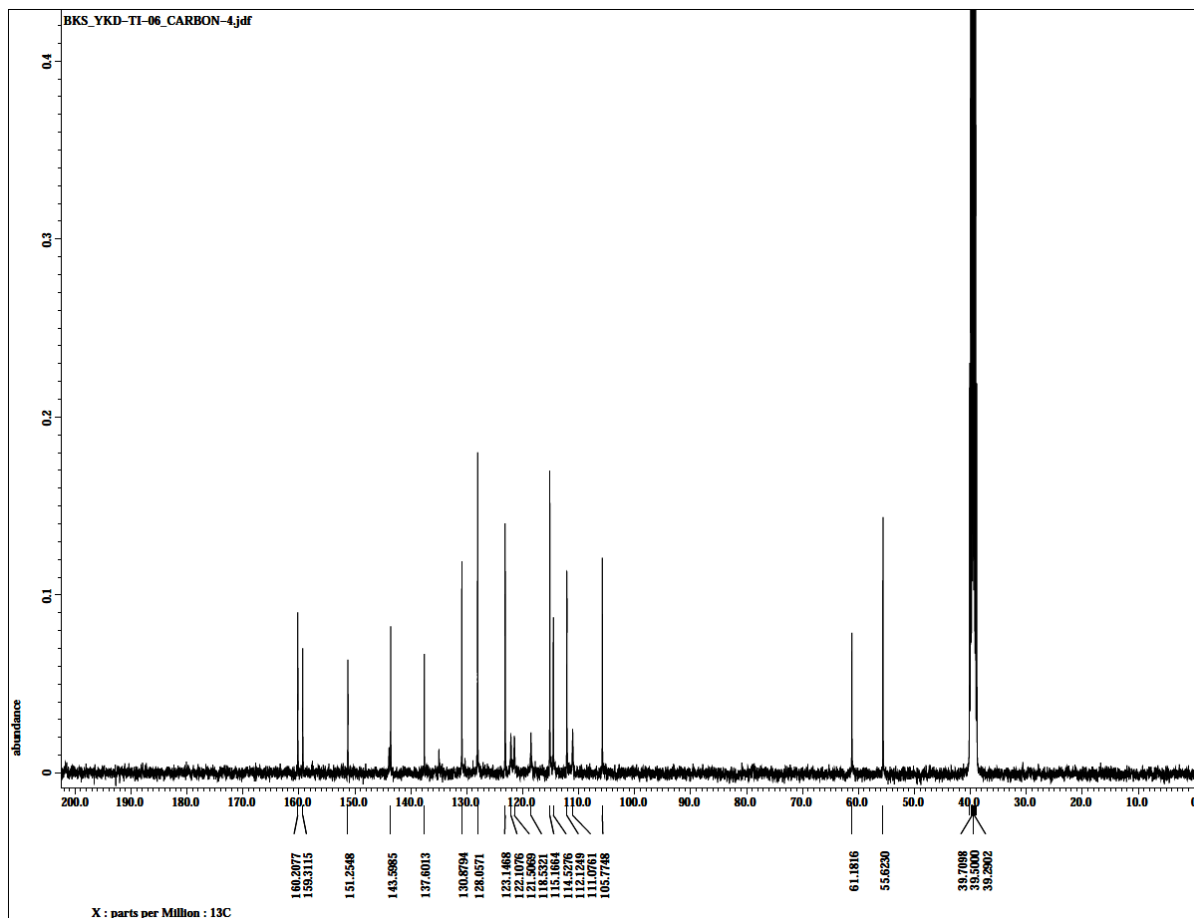

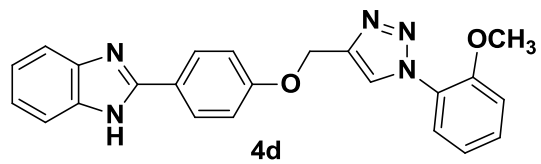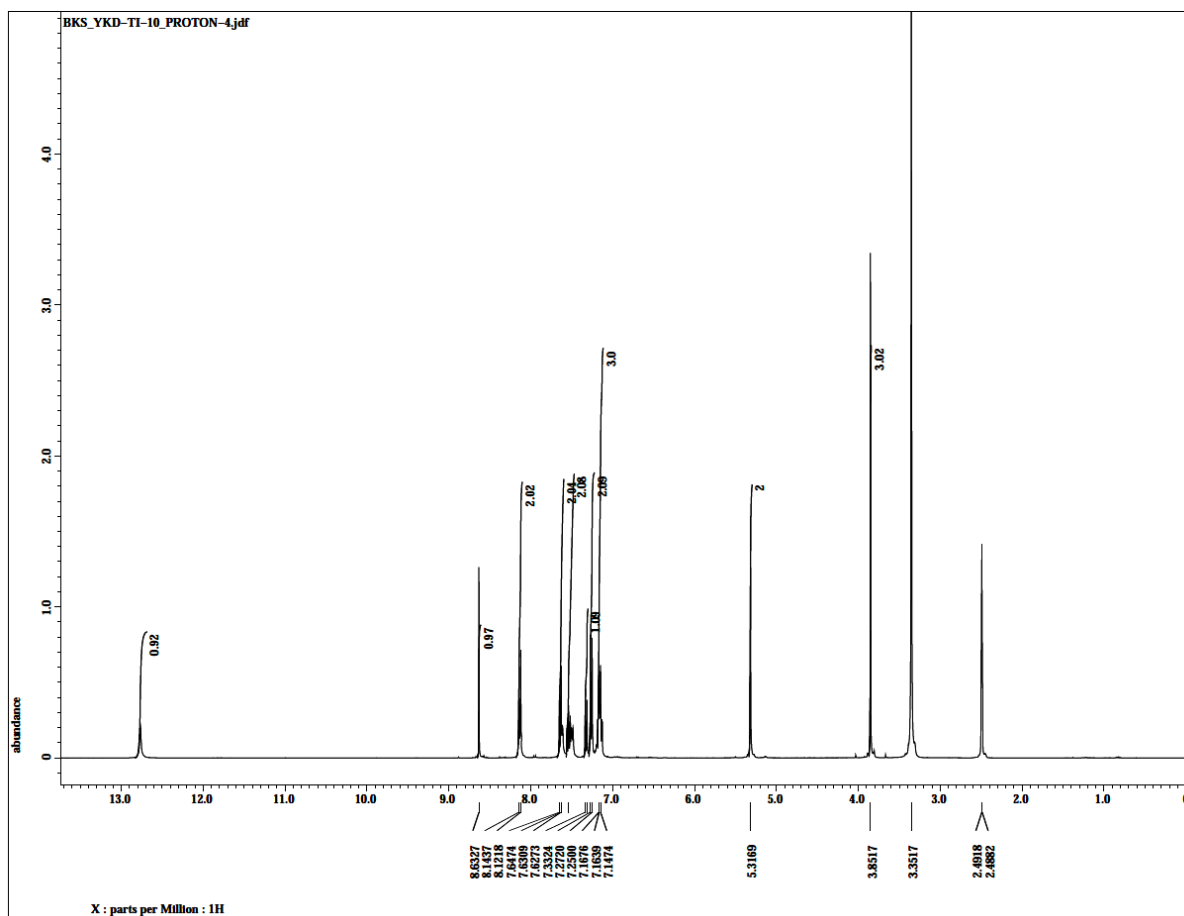

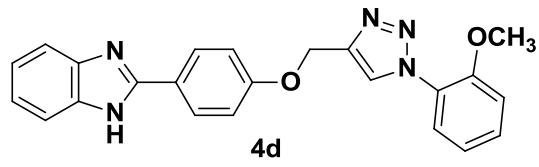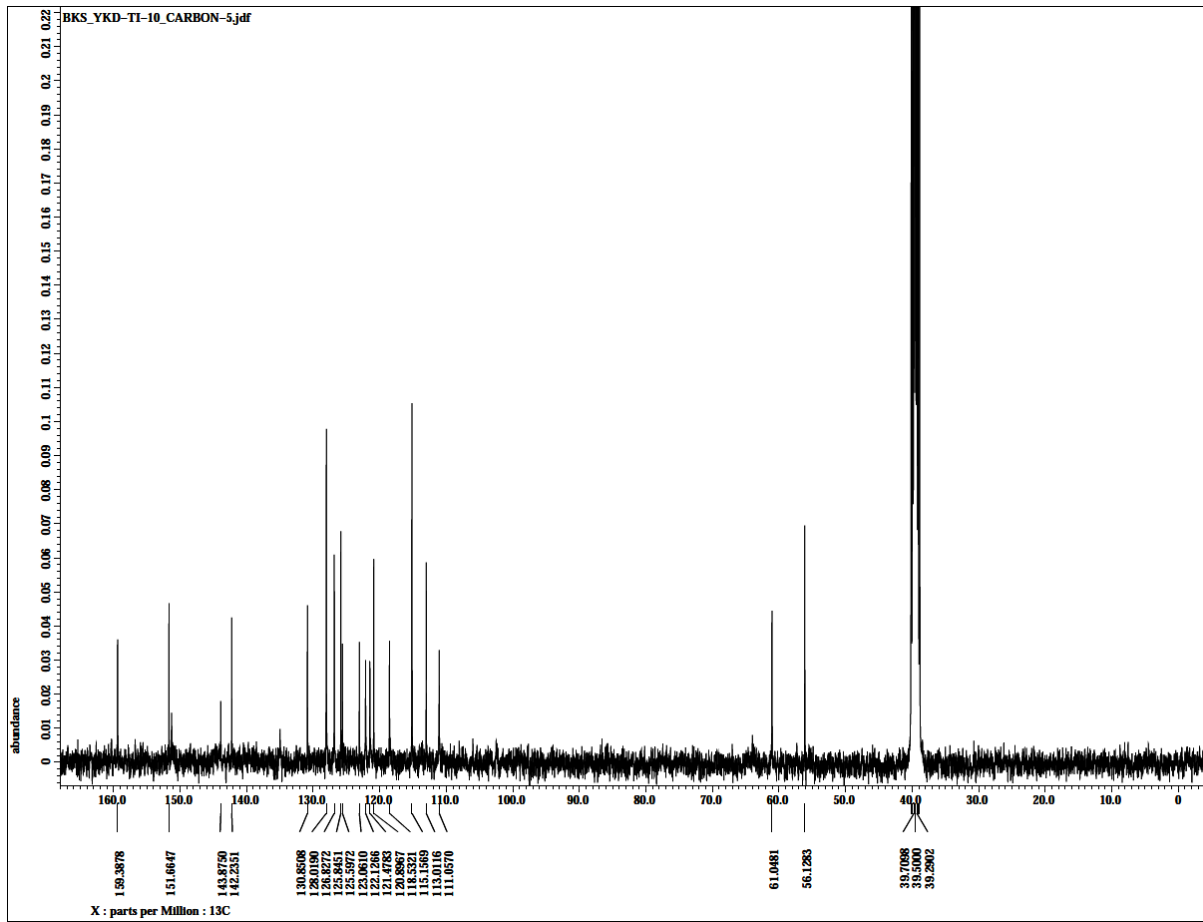

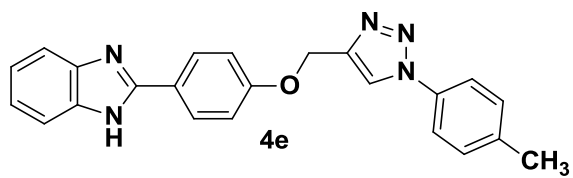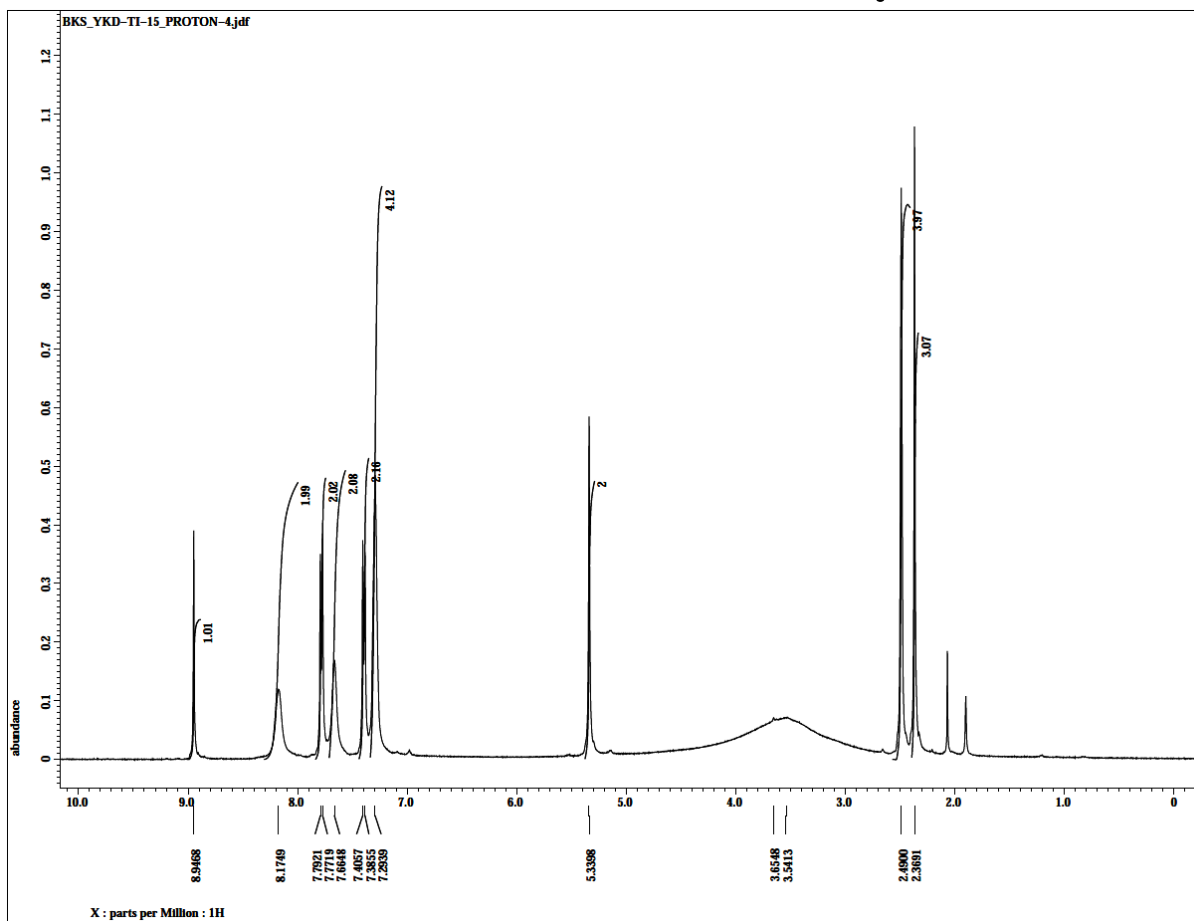

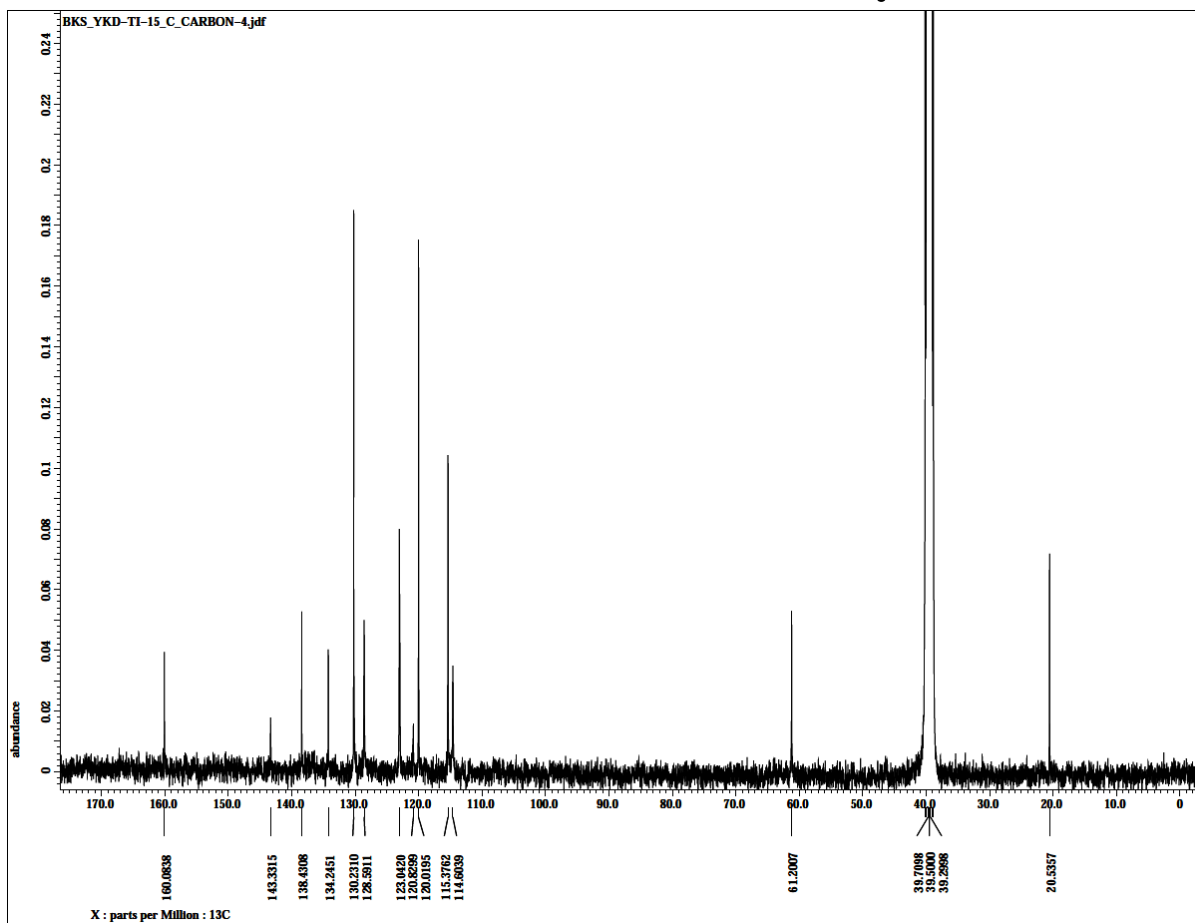

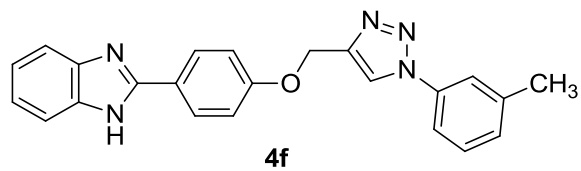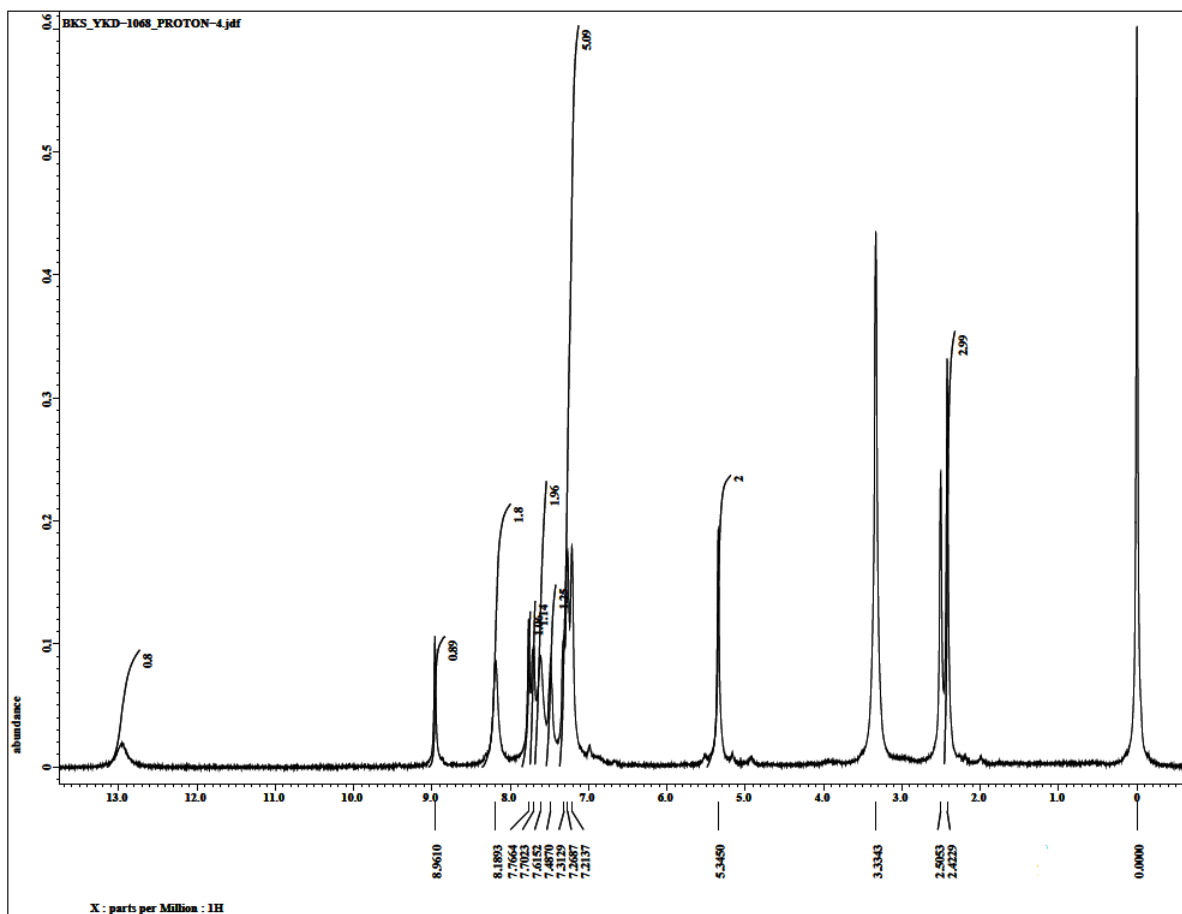

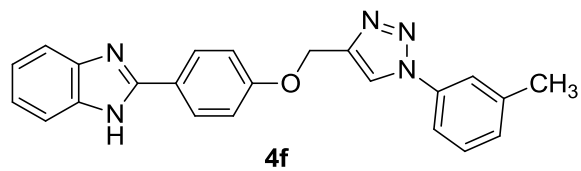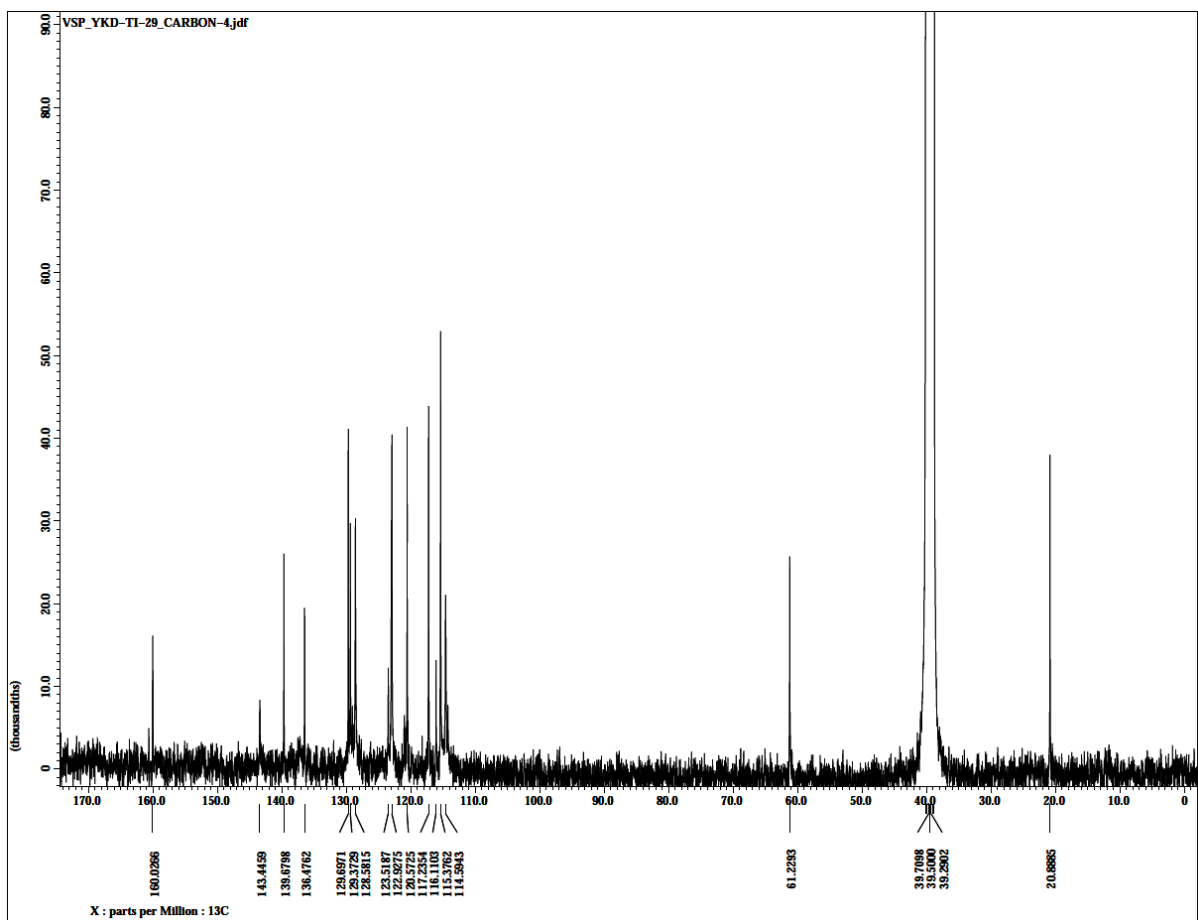



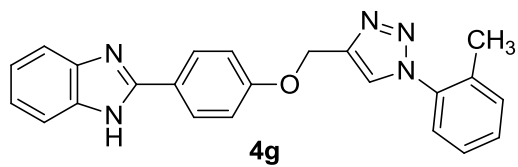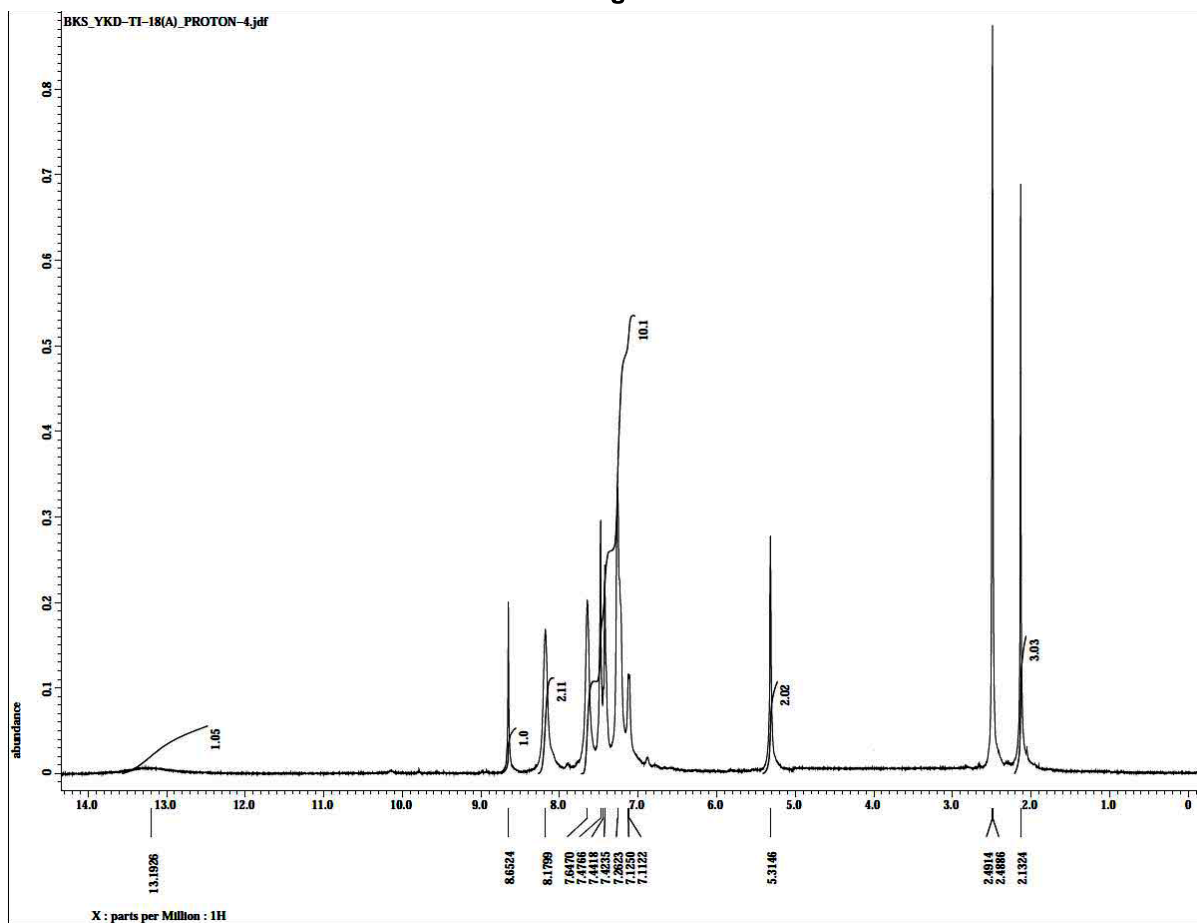

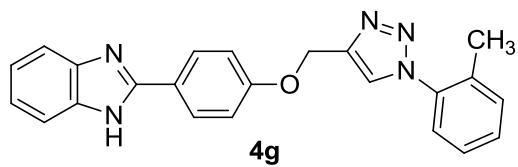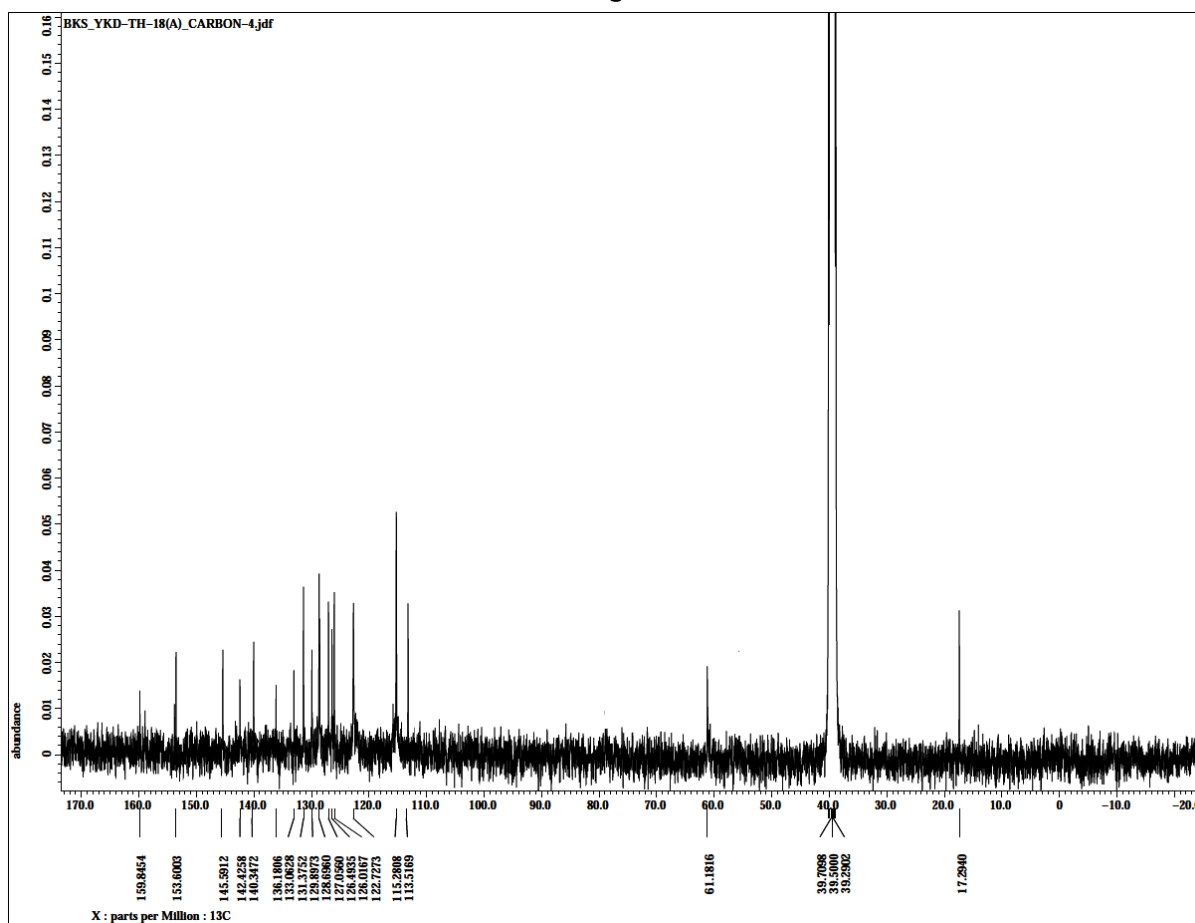

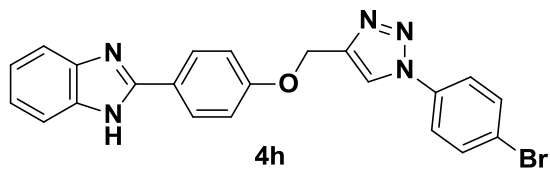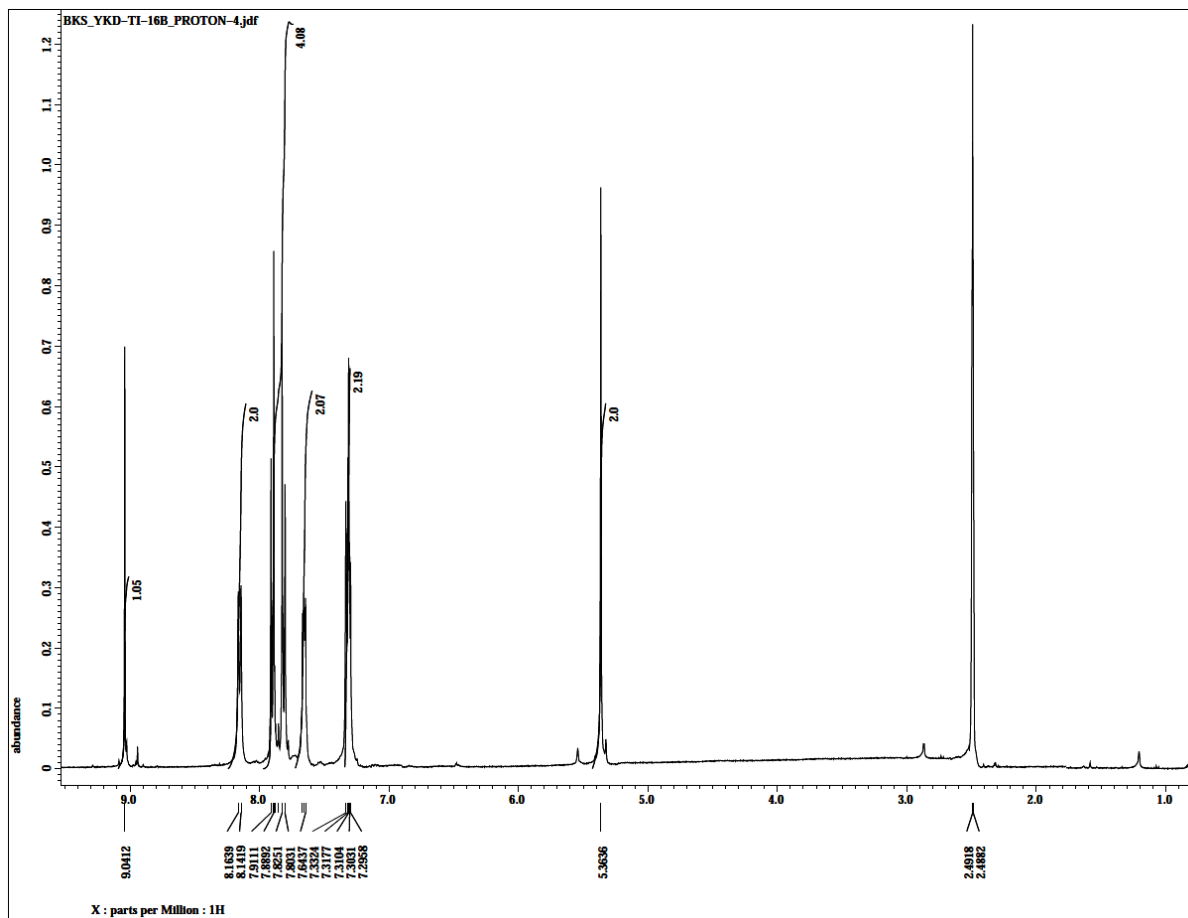

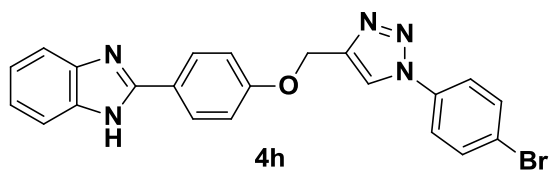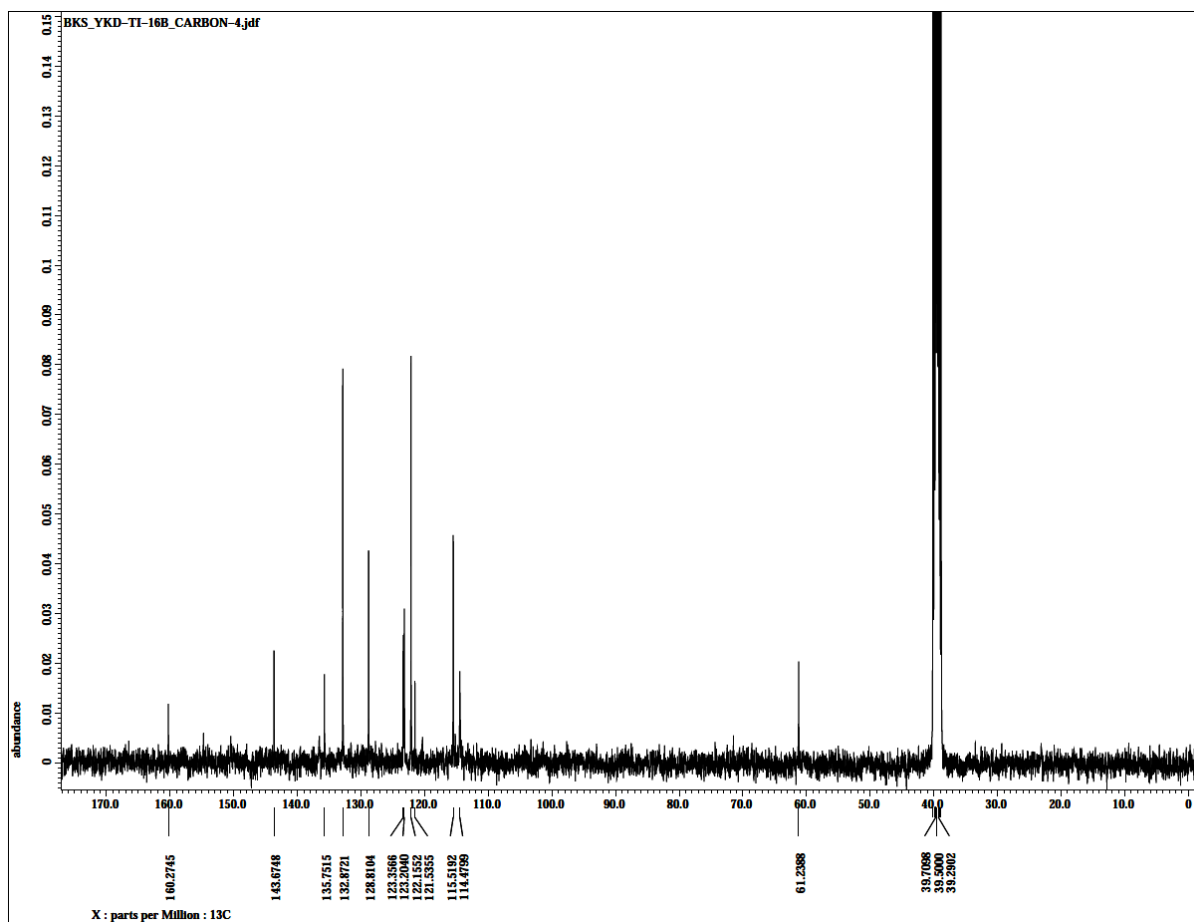

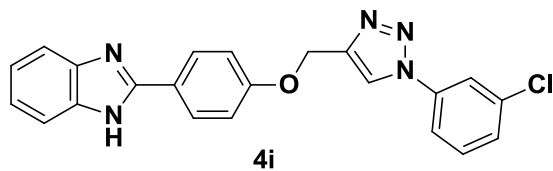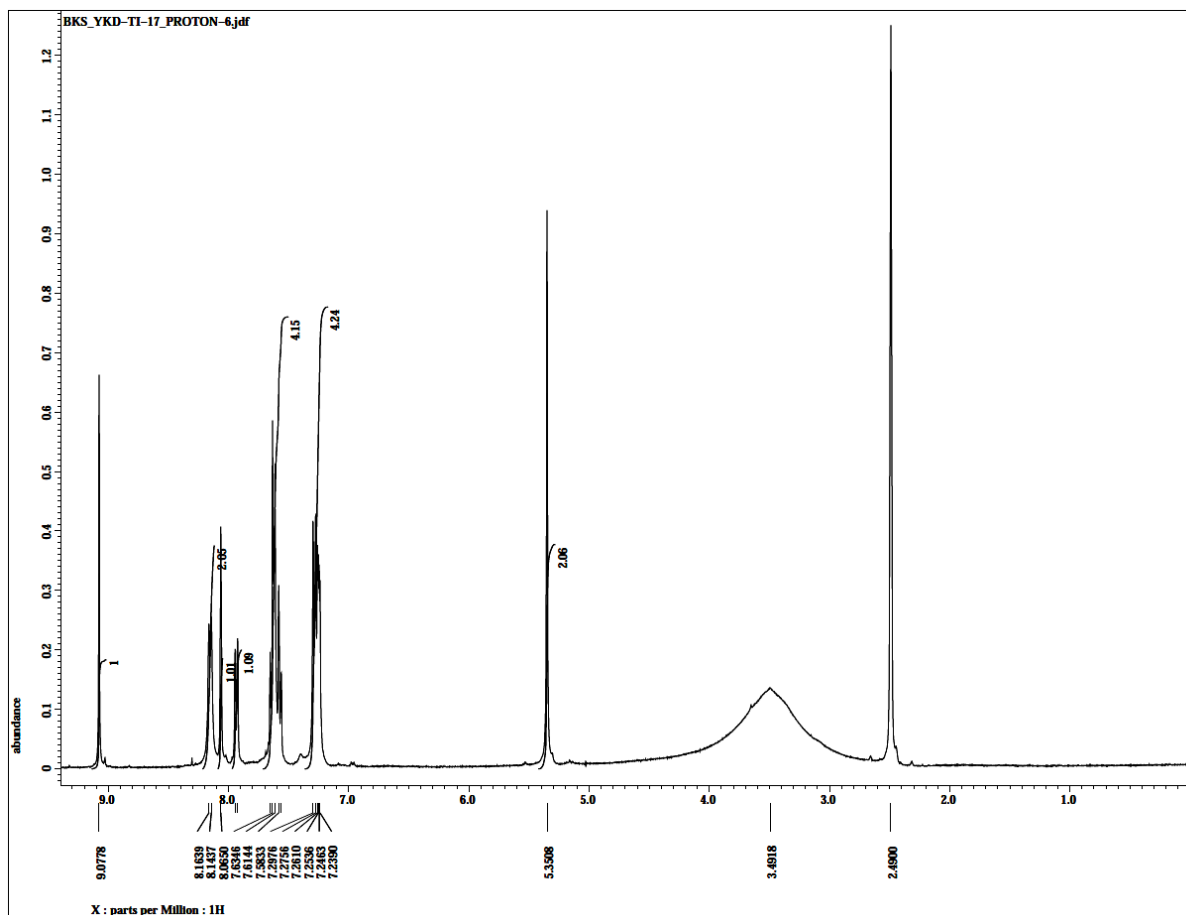

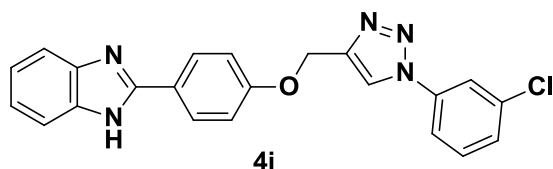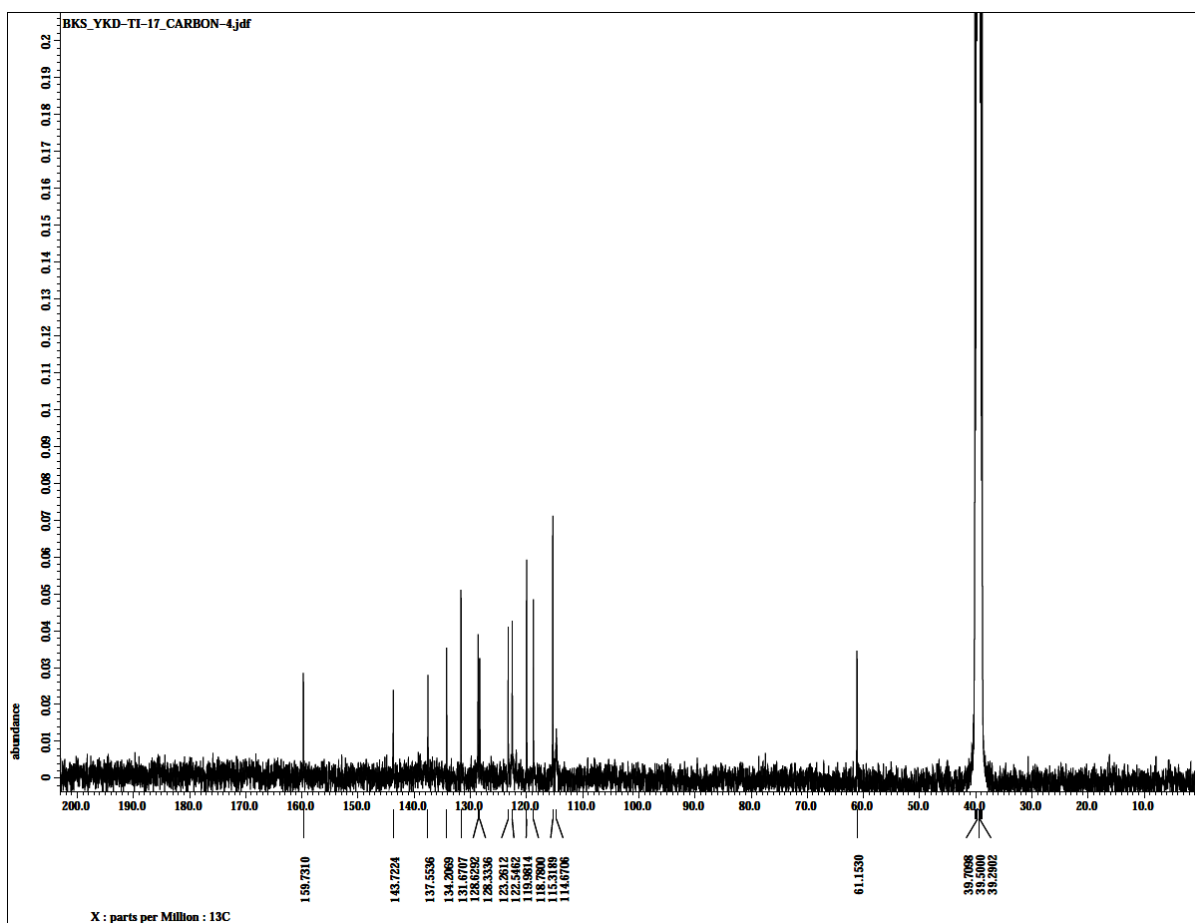

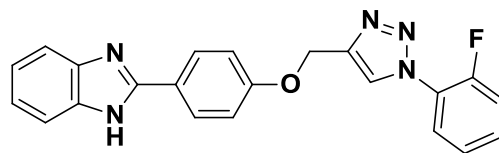

4j

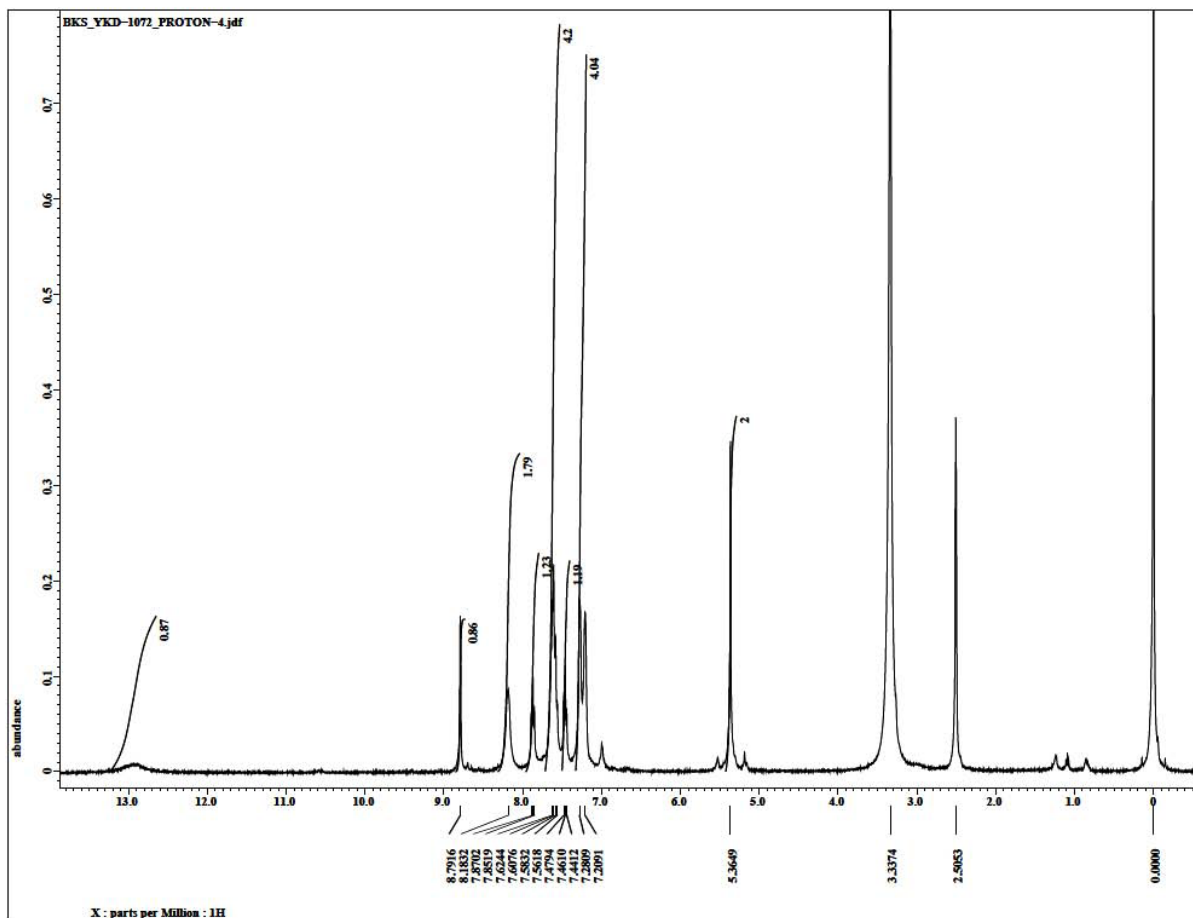

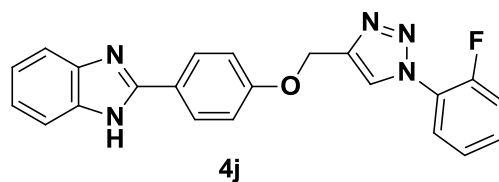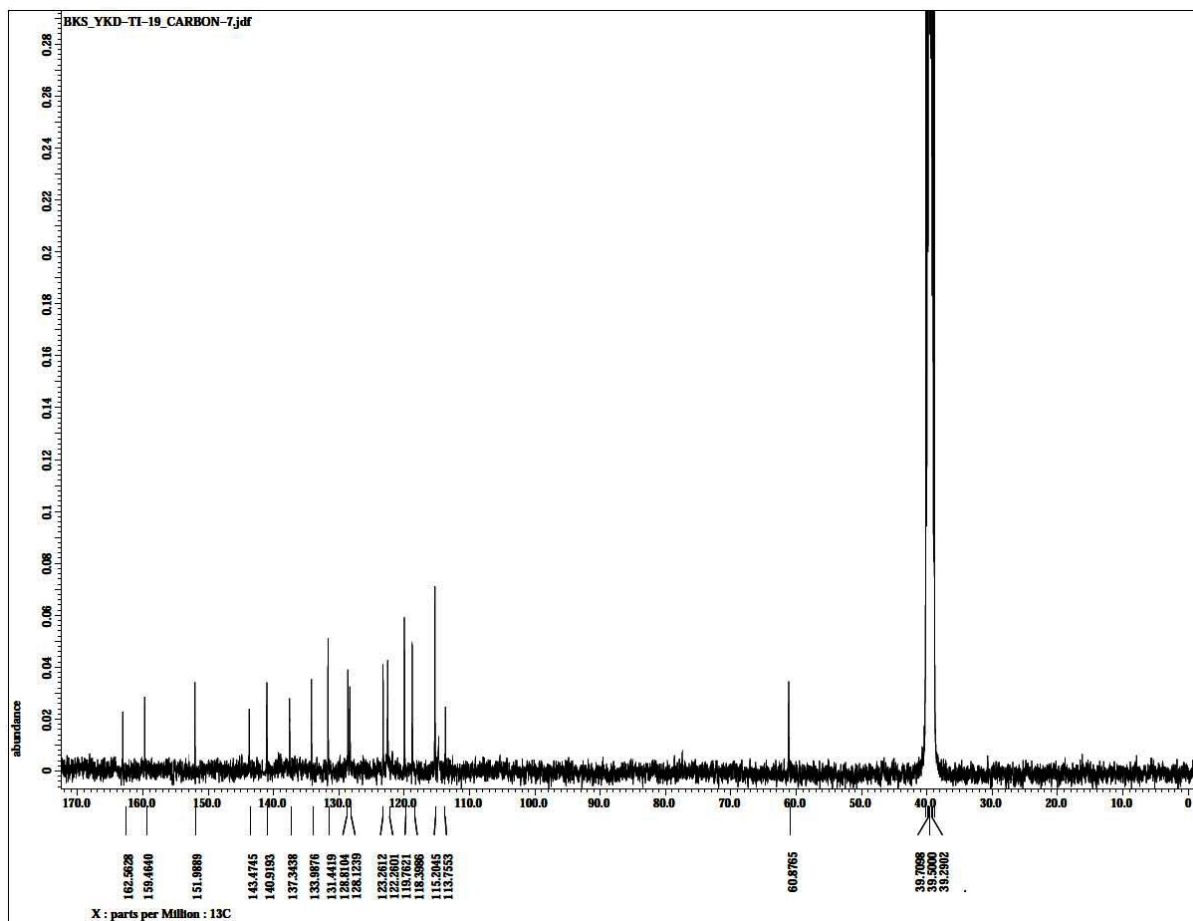



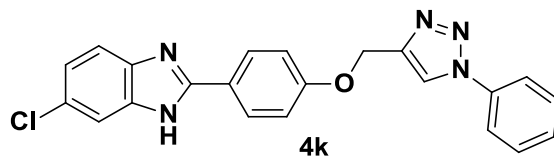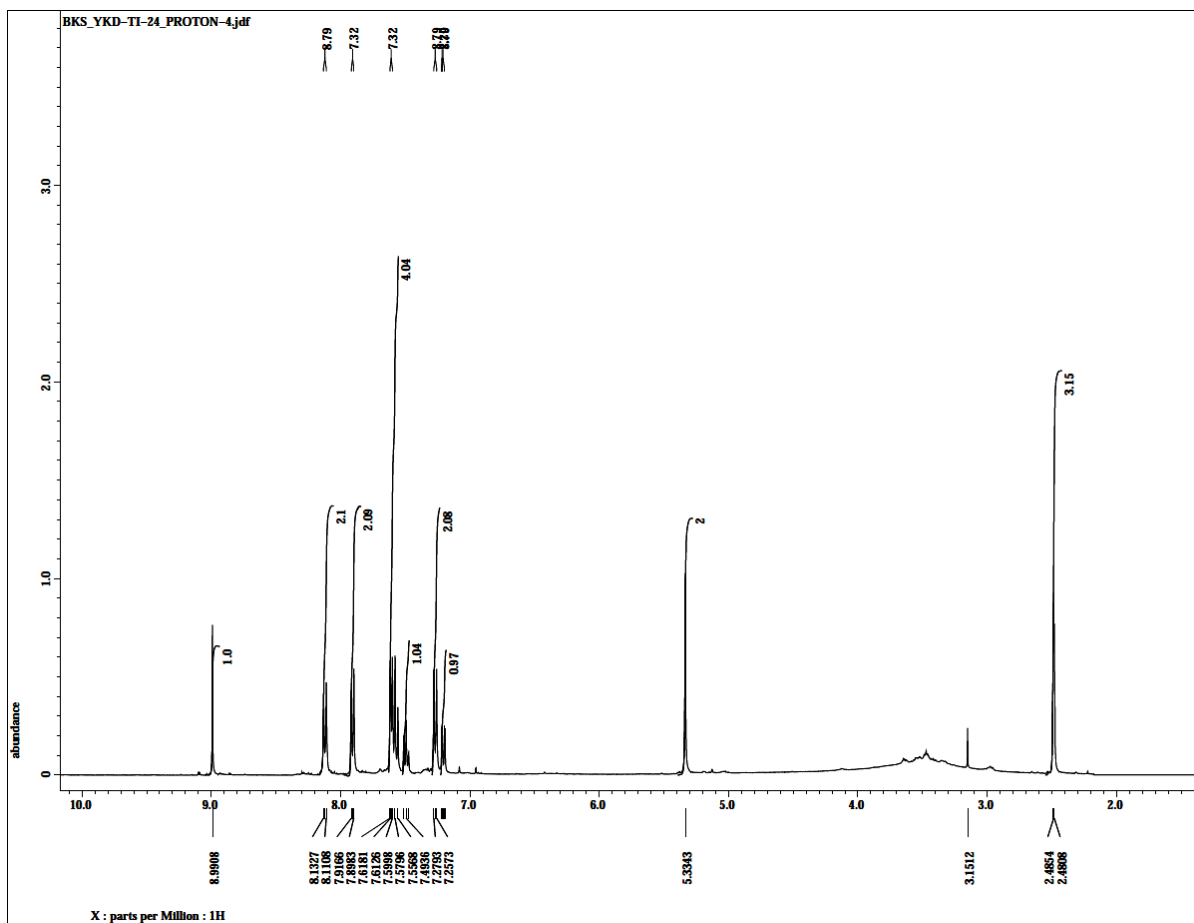

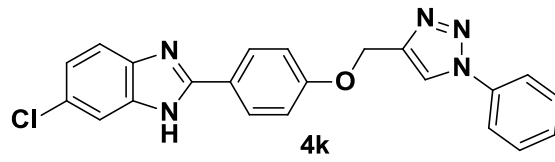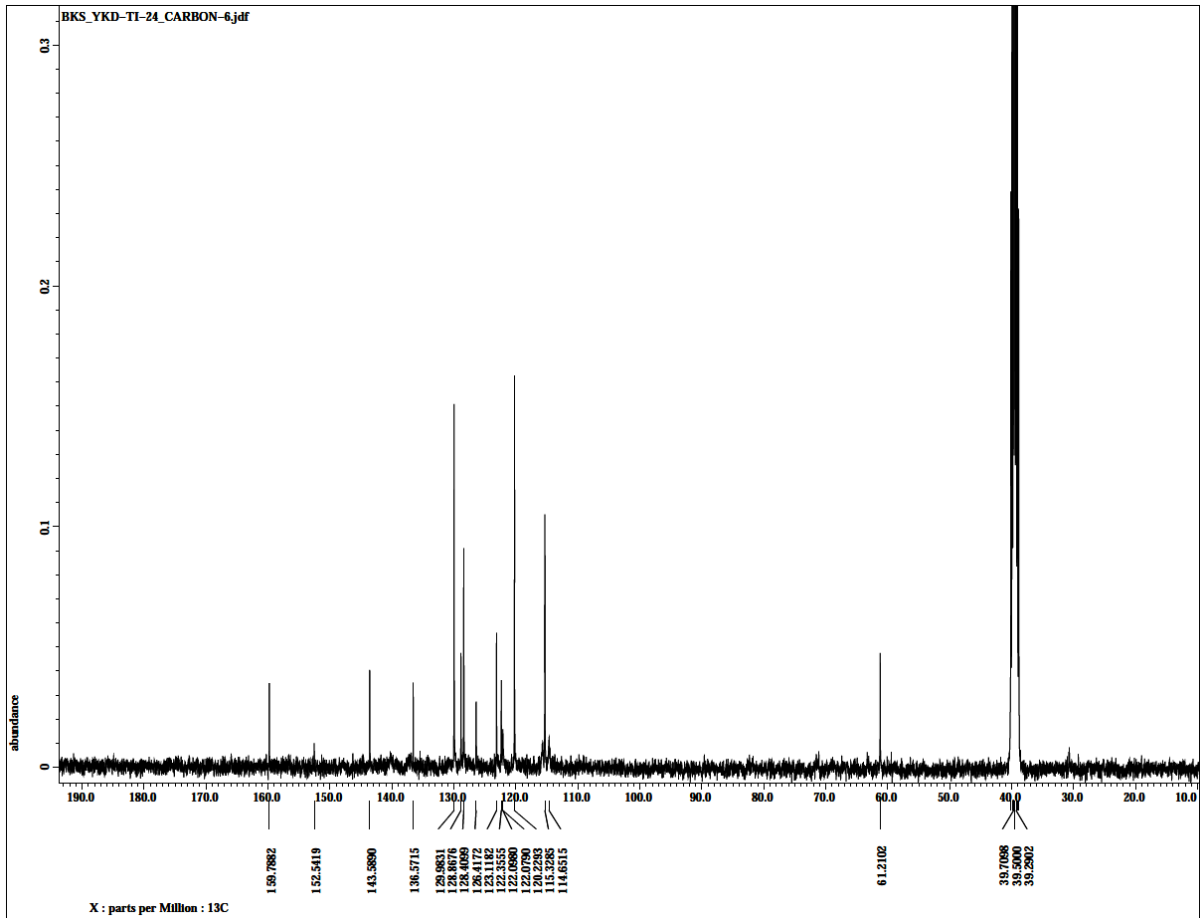

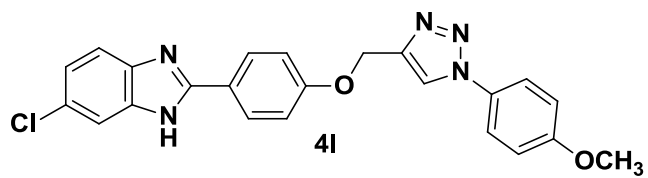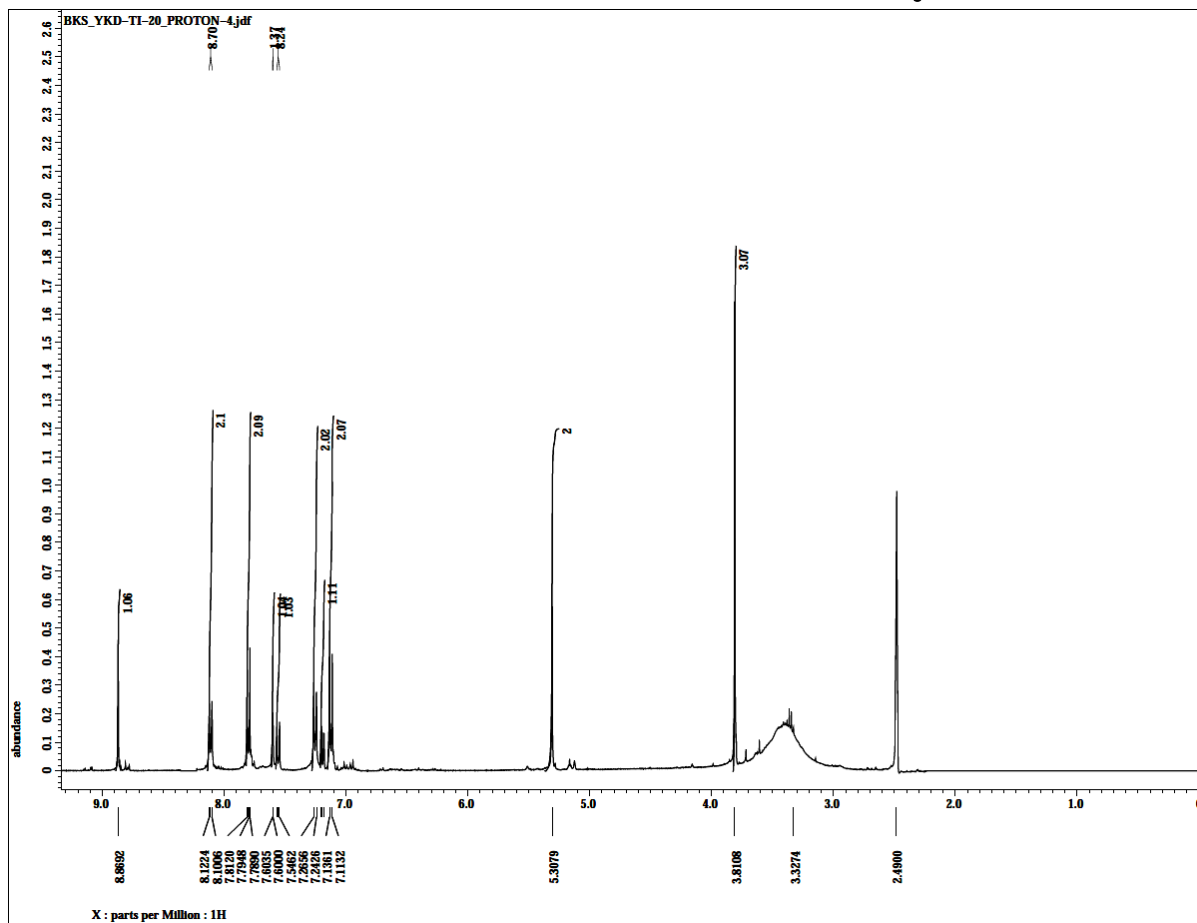

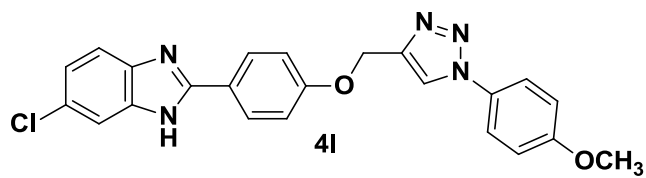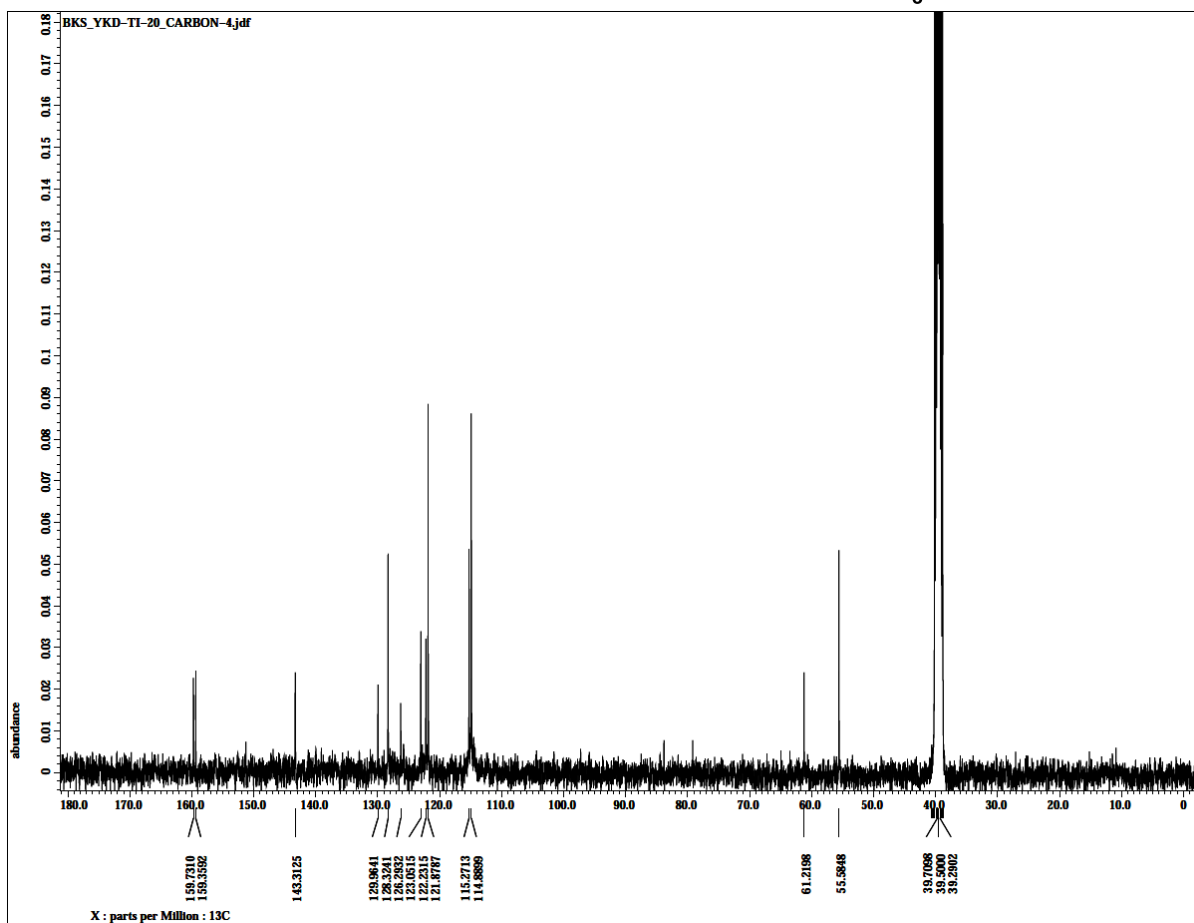

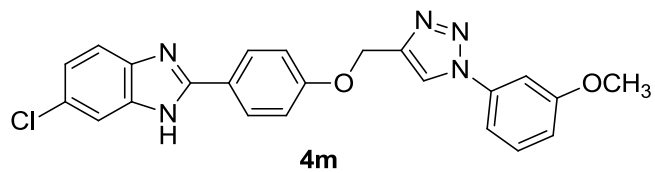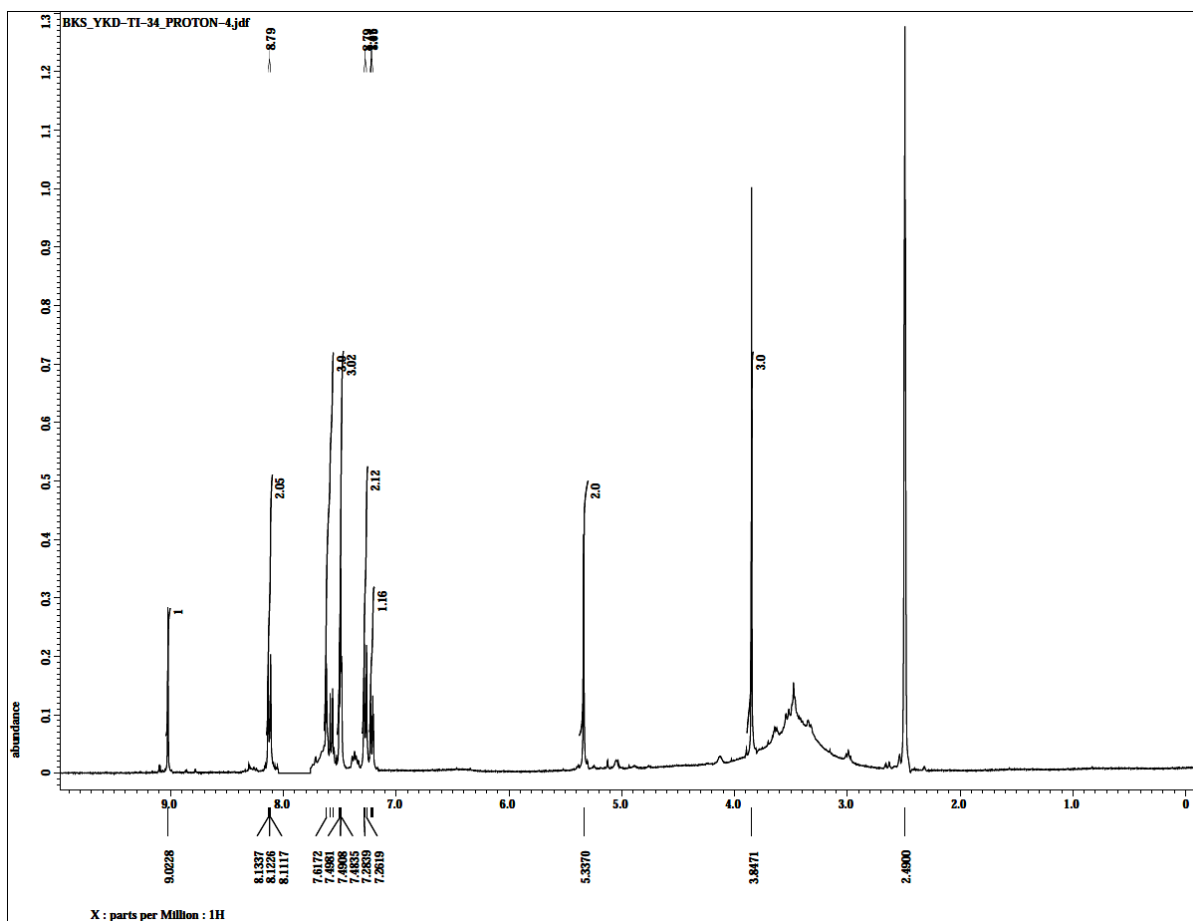

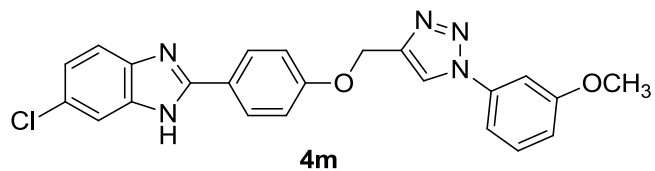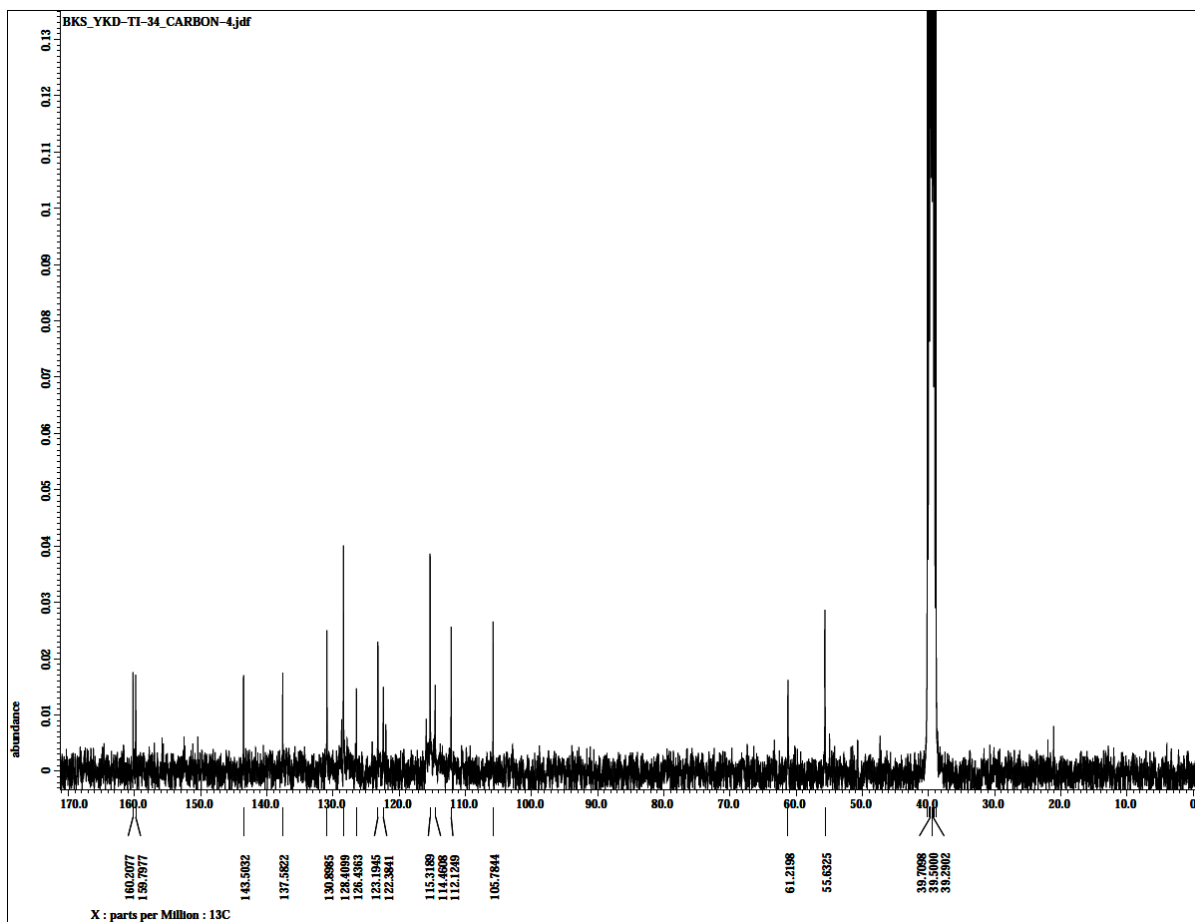

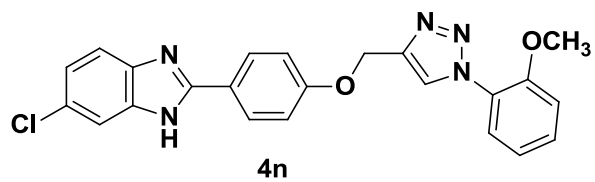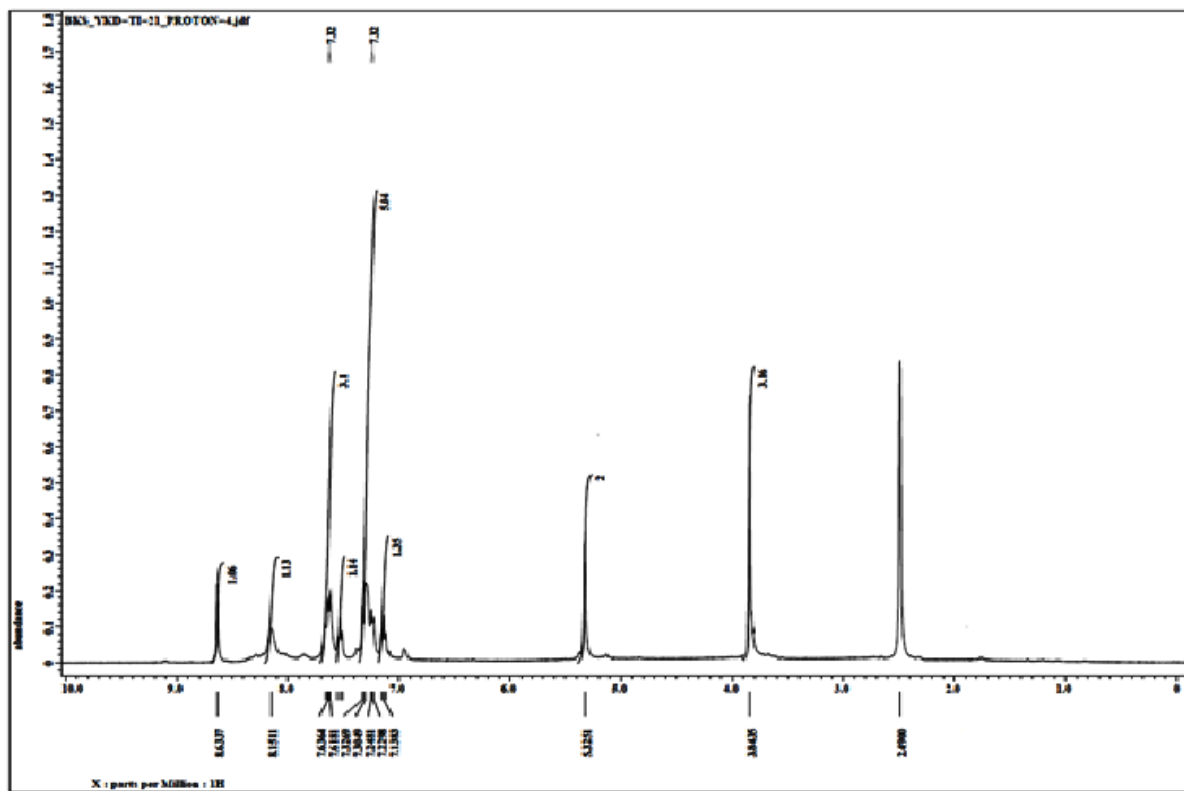

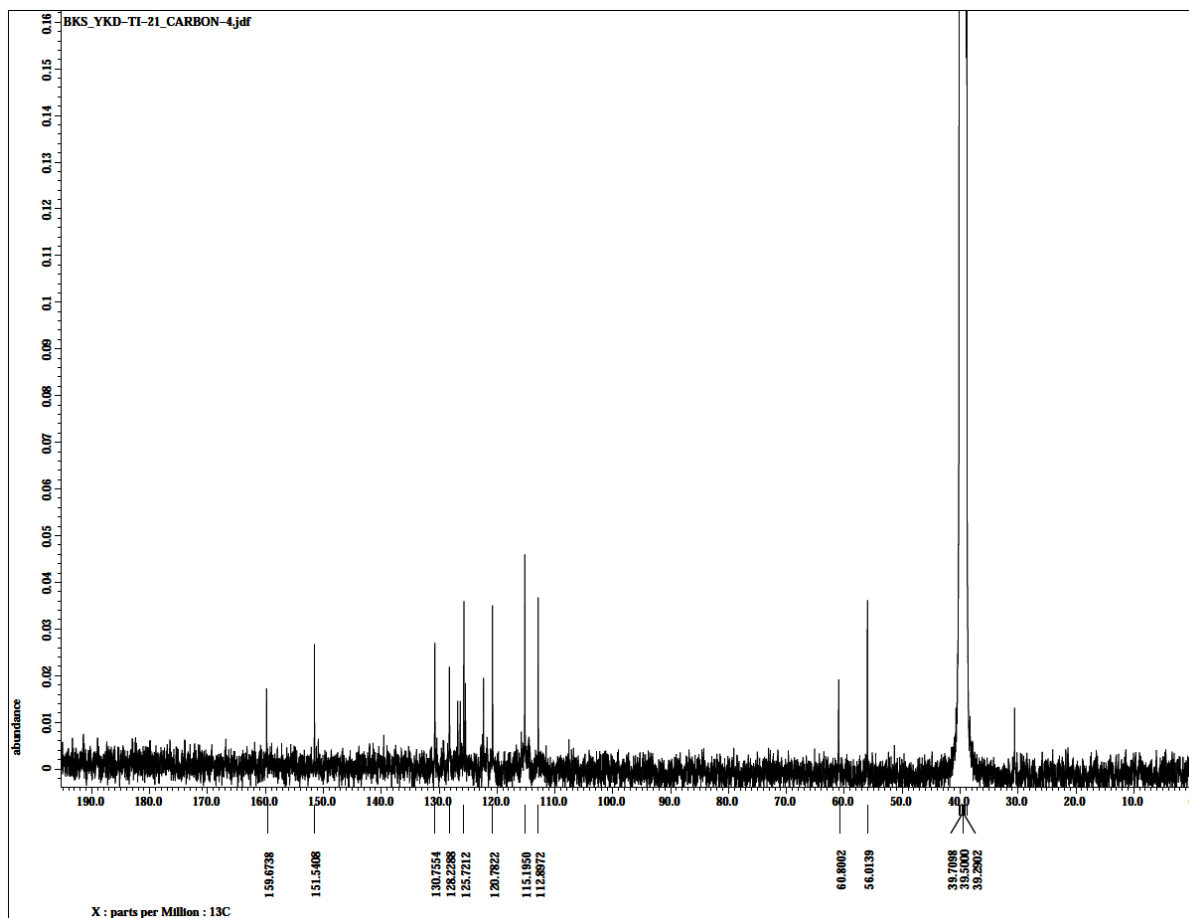



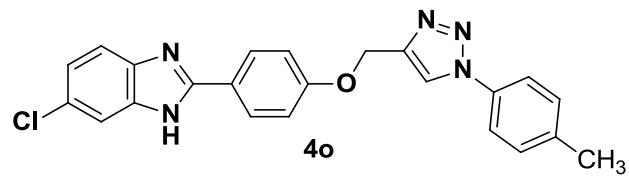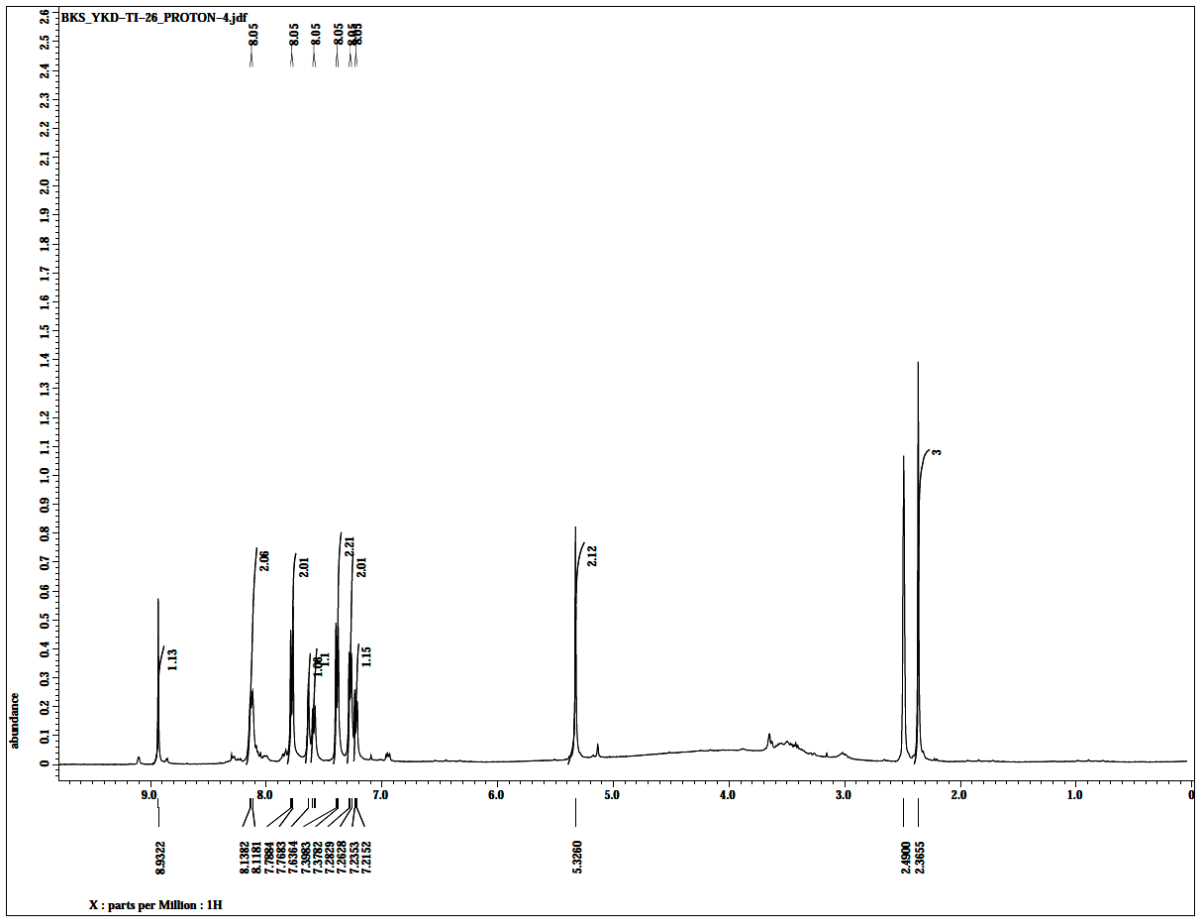

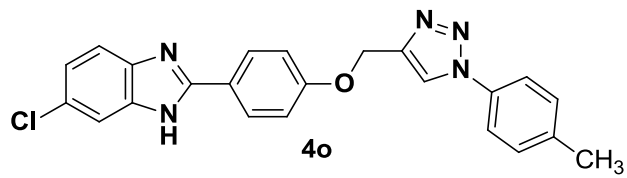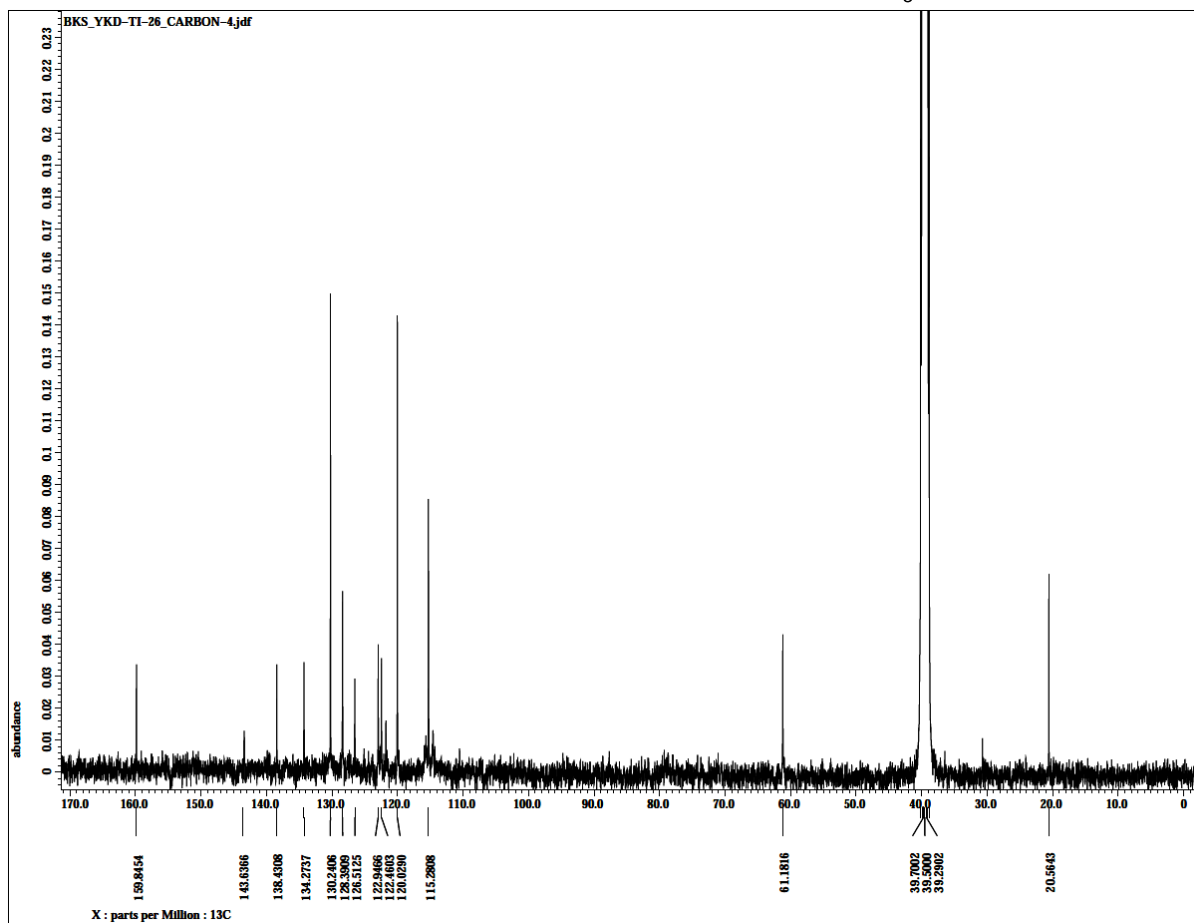

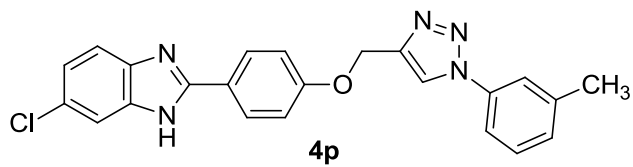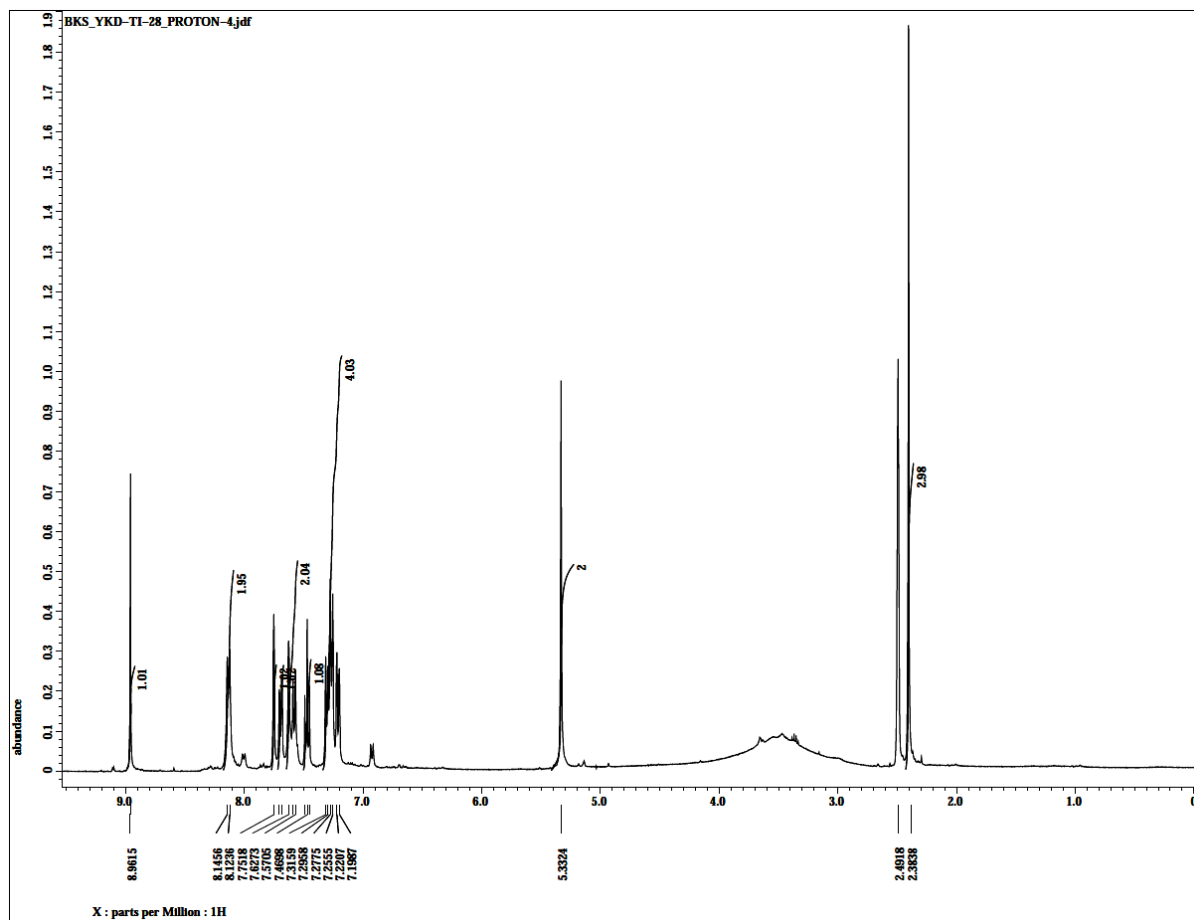

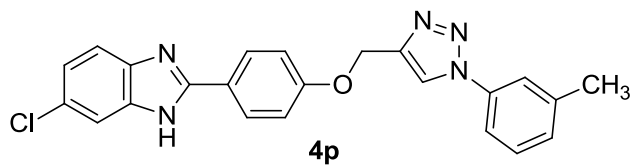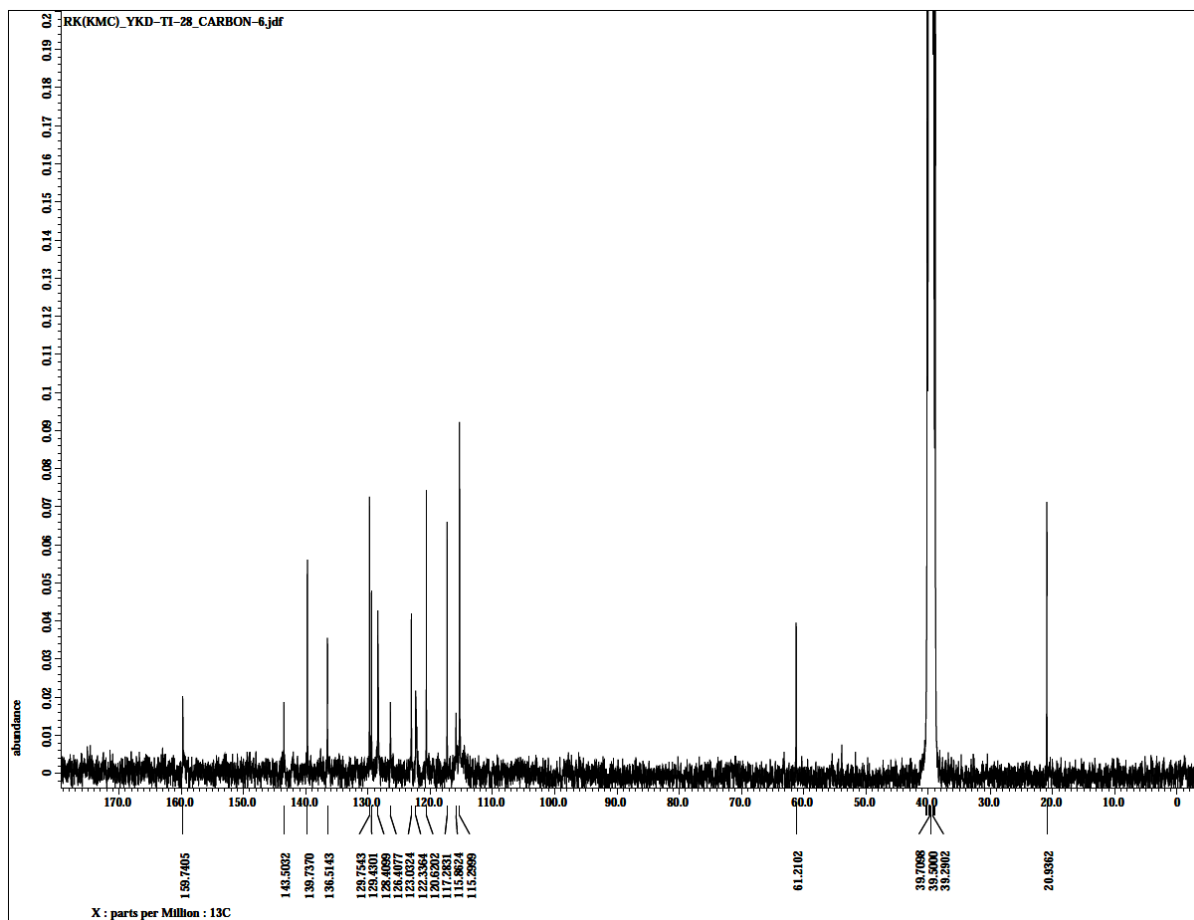

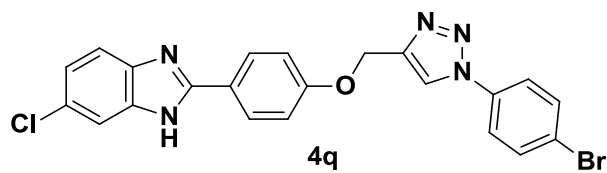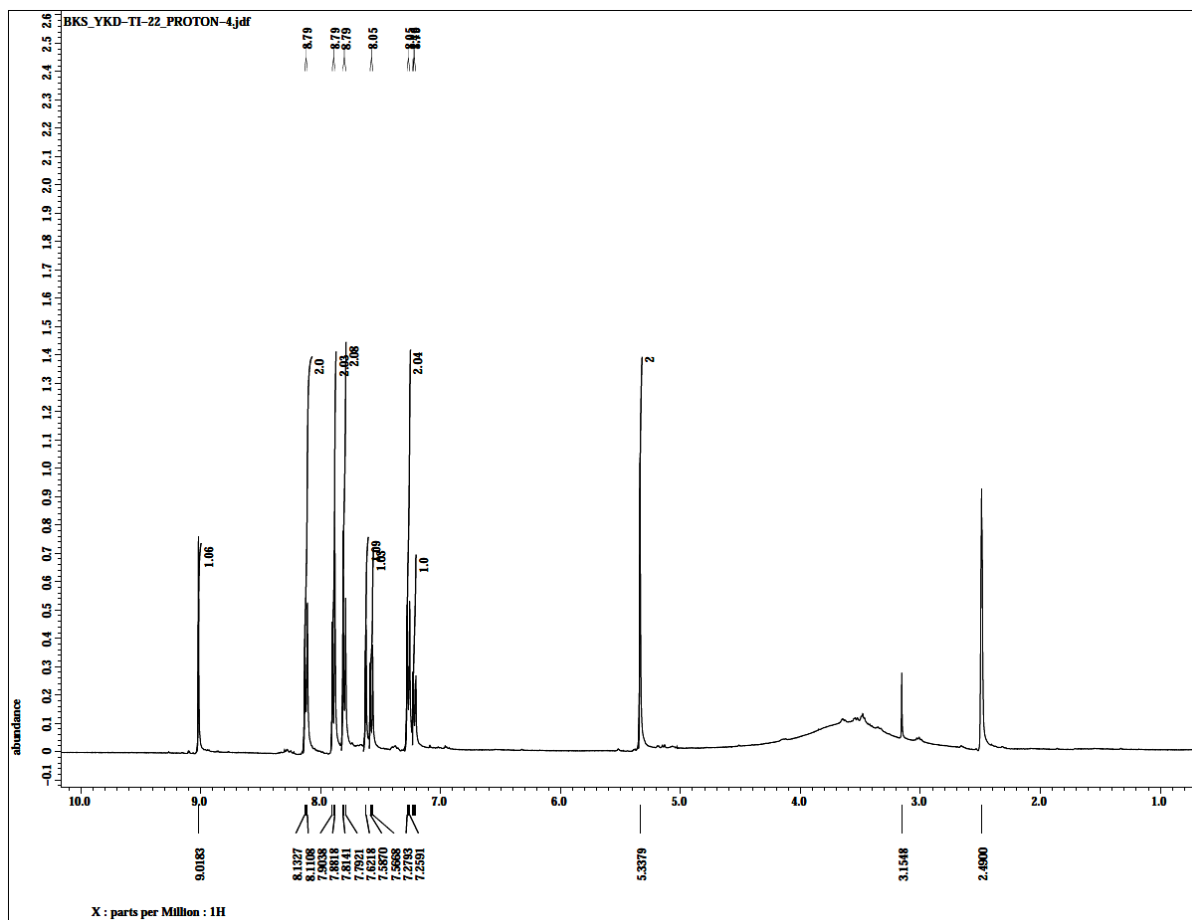

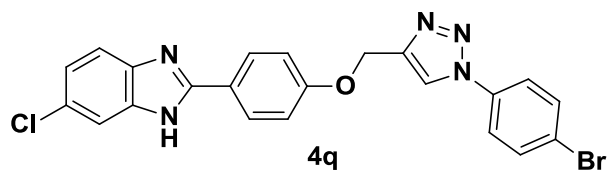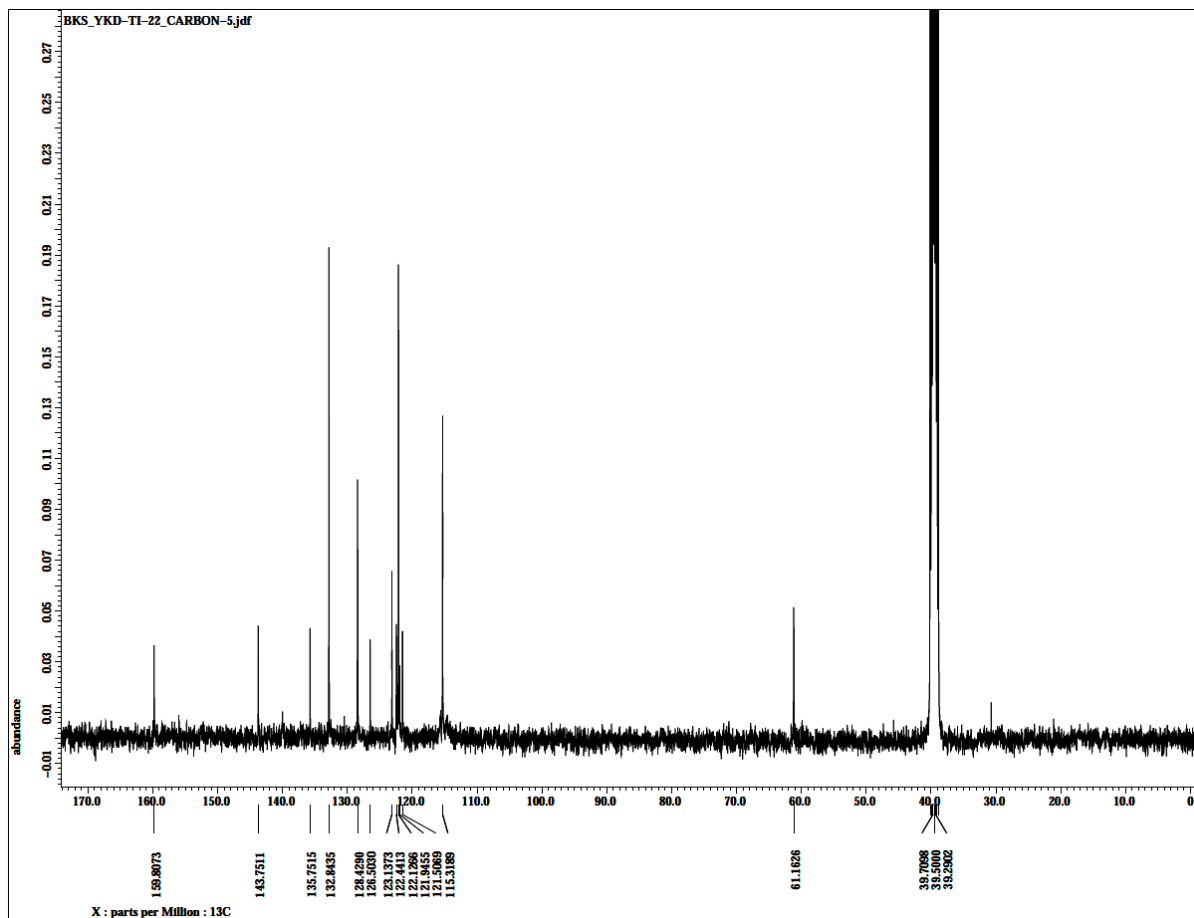

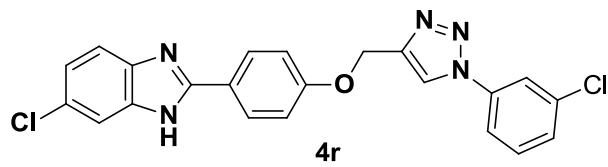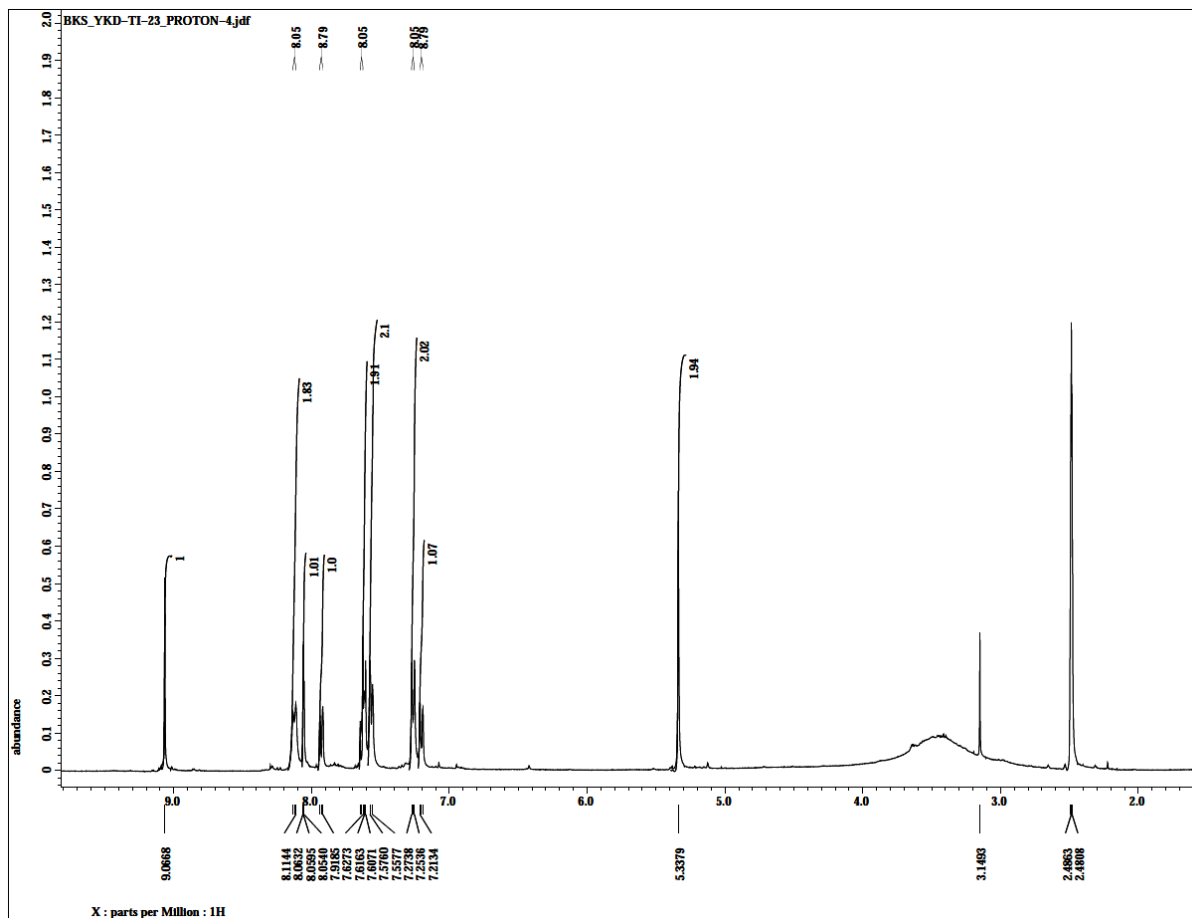

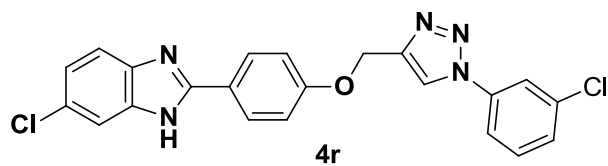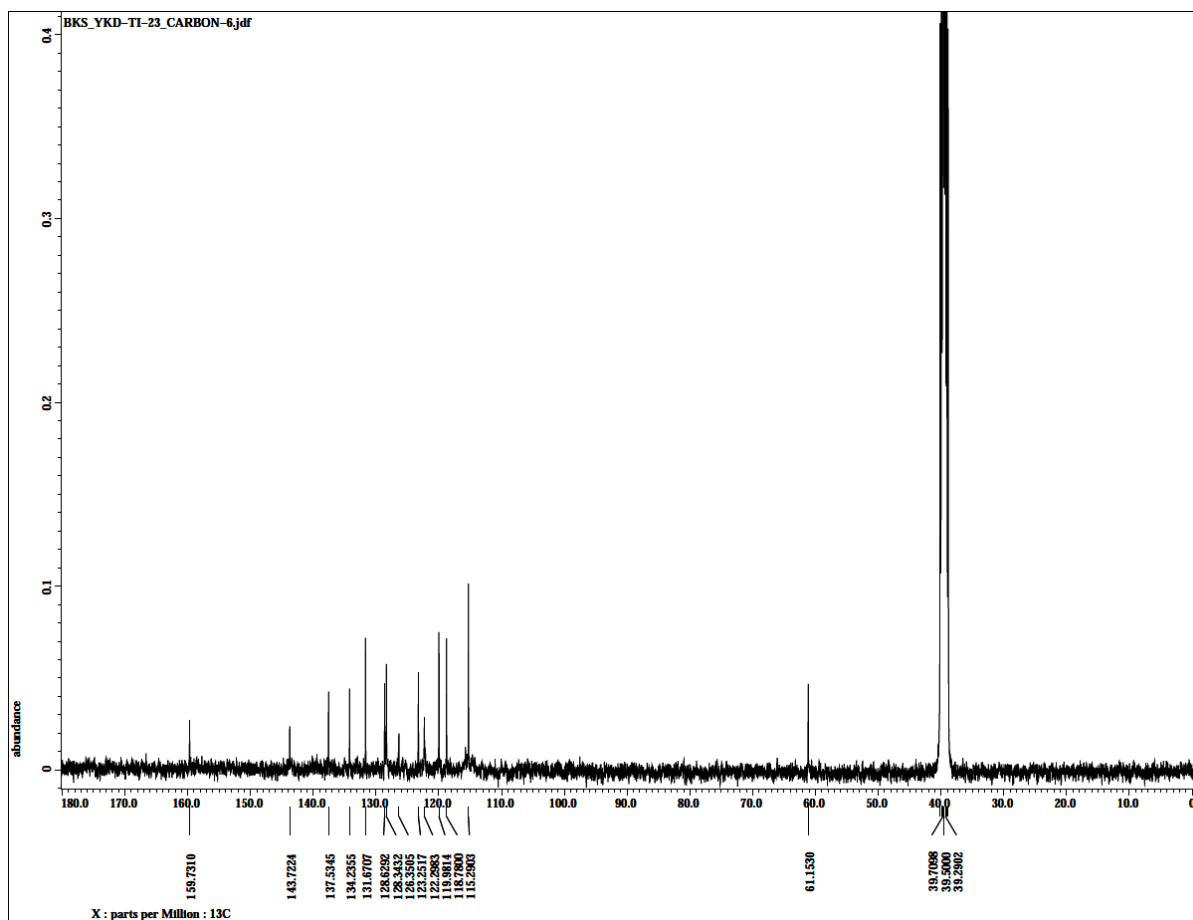



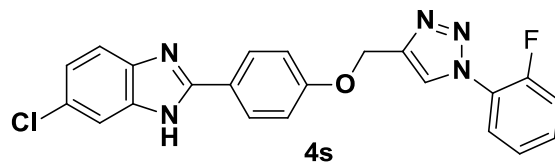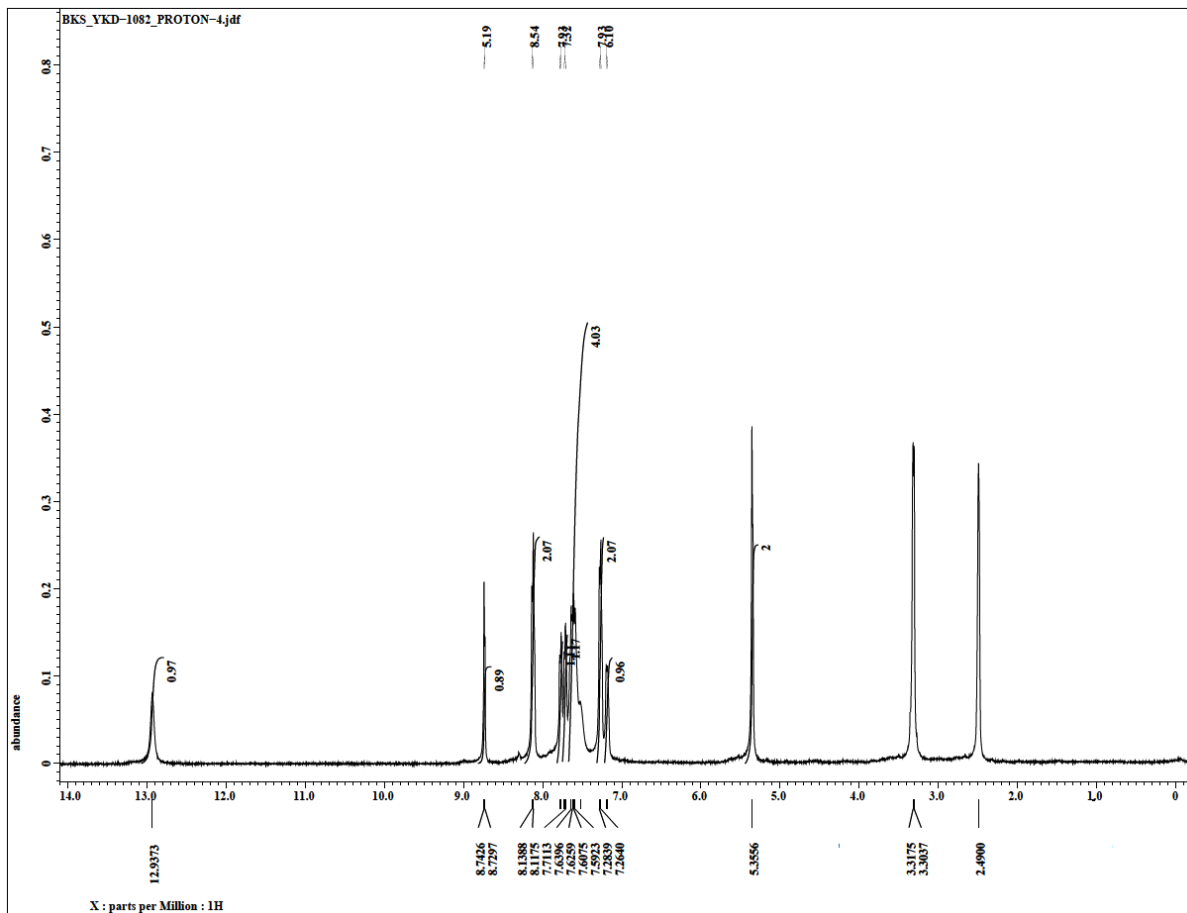

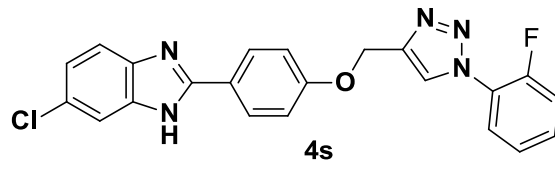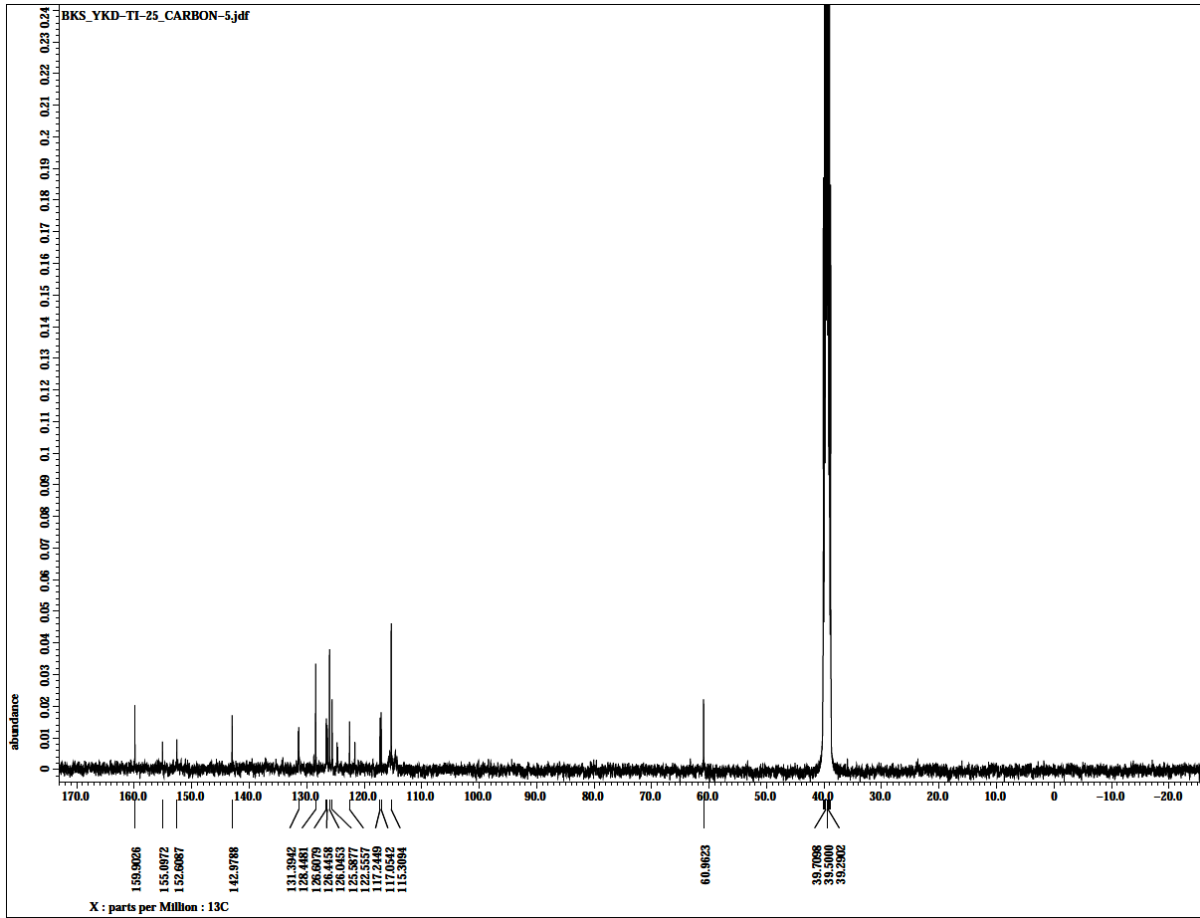

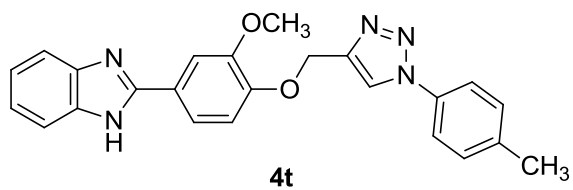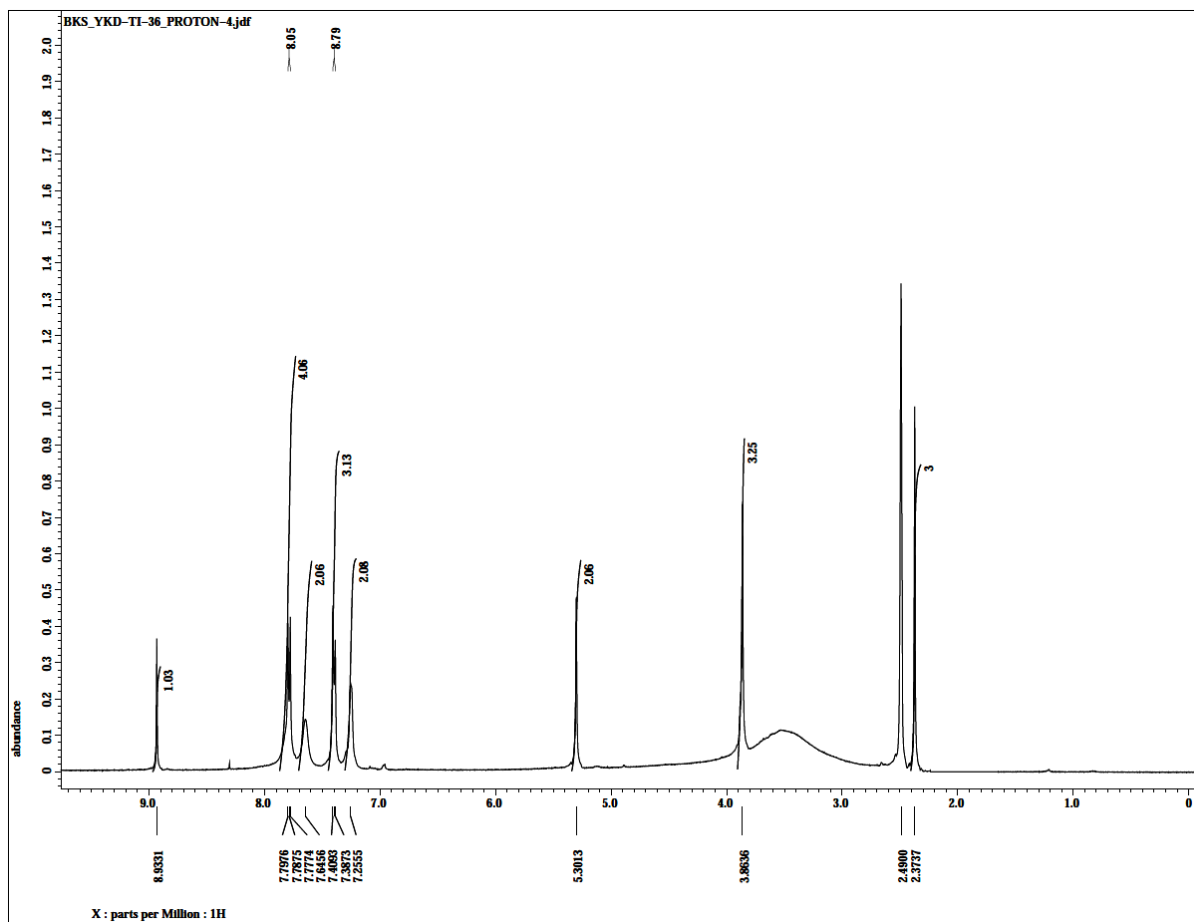

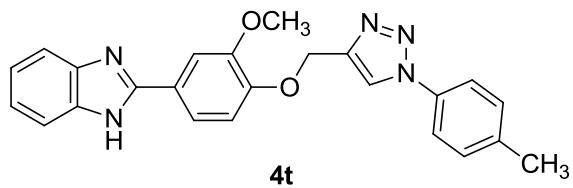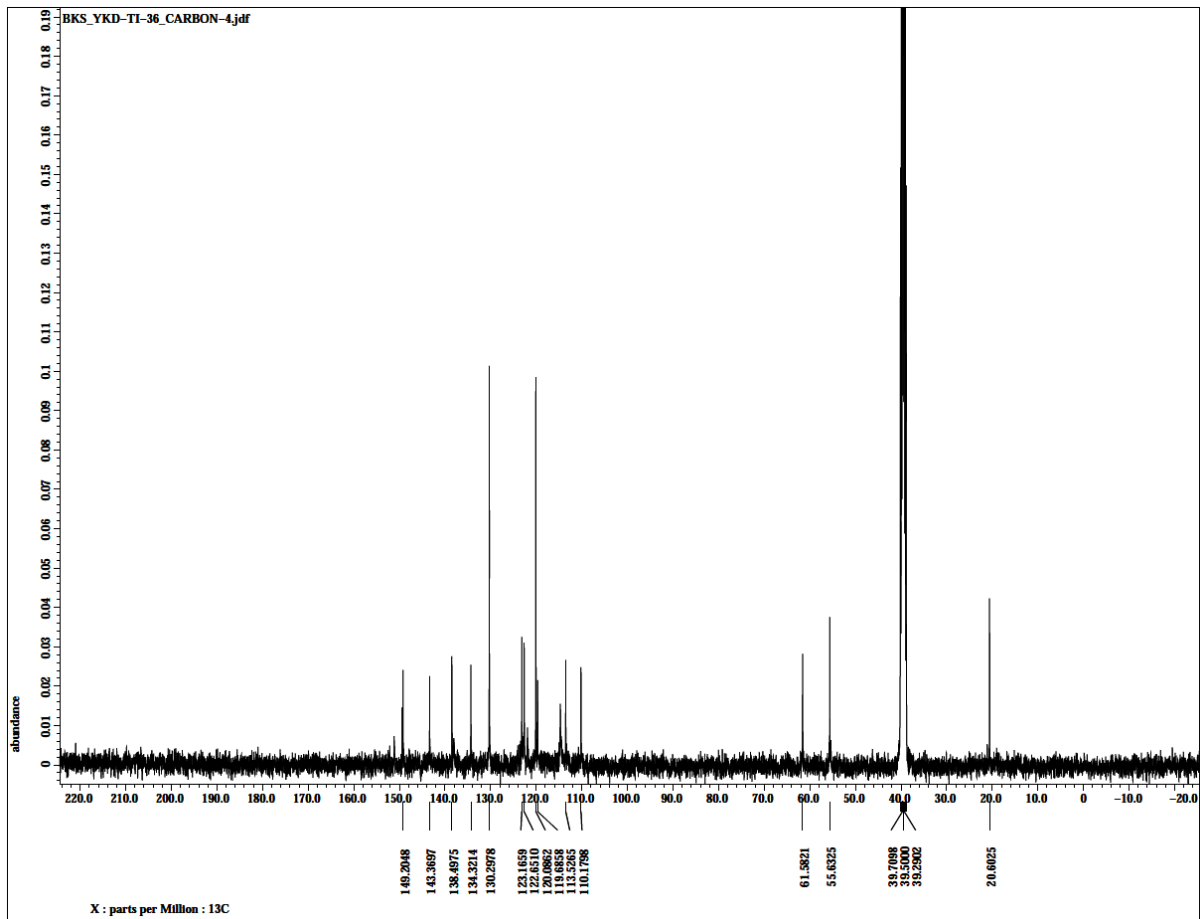

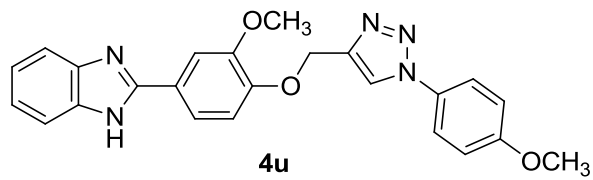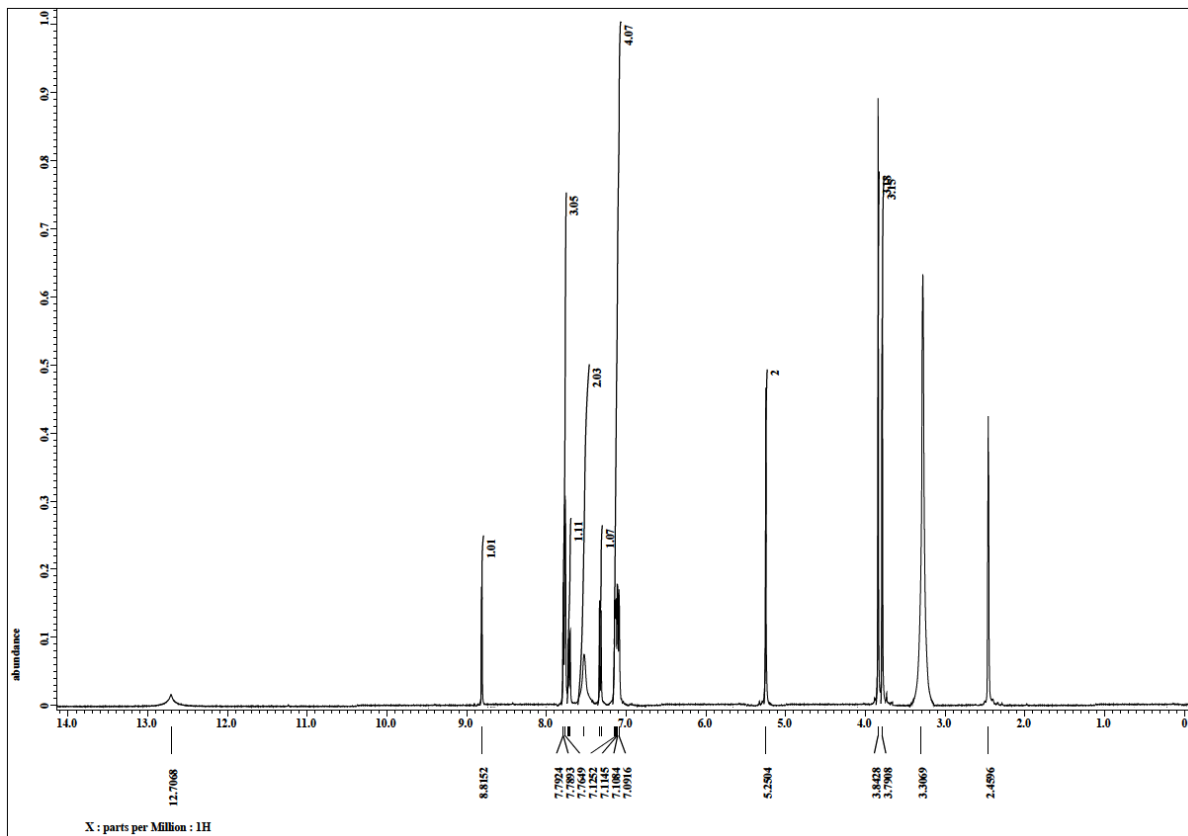

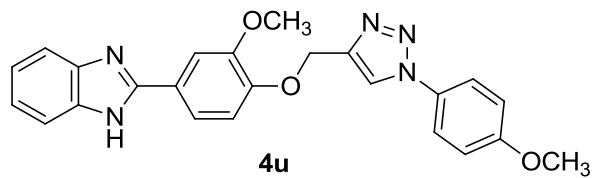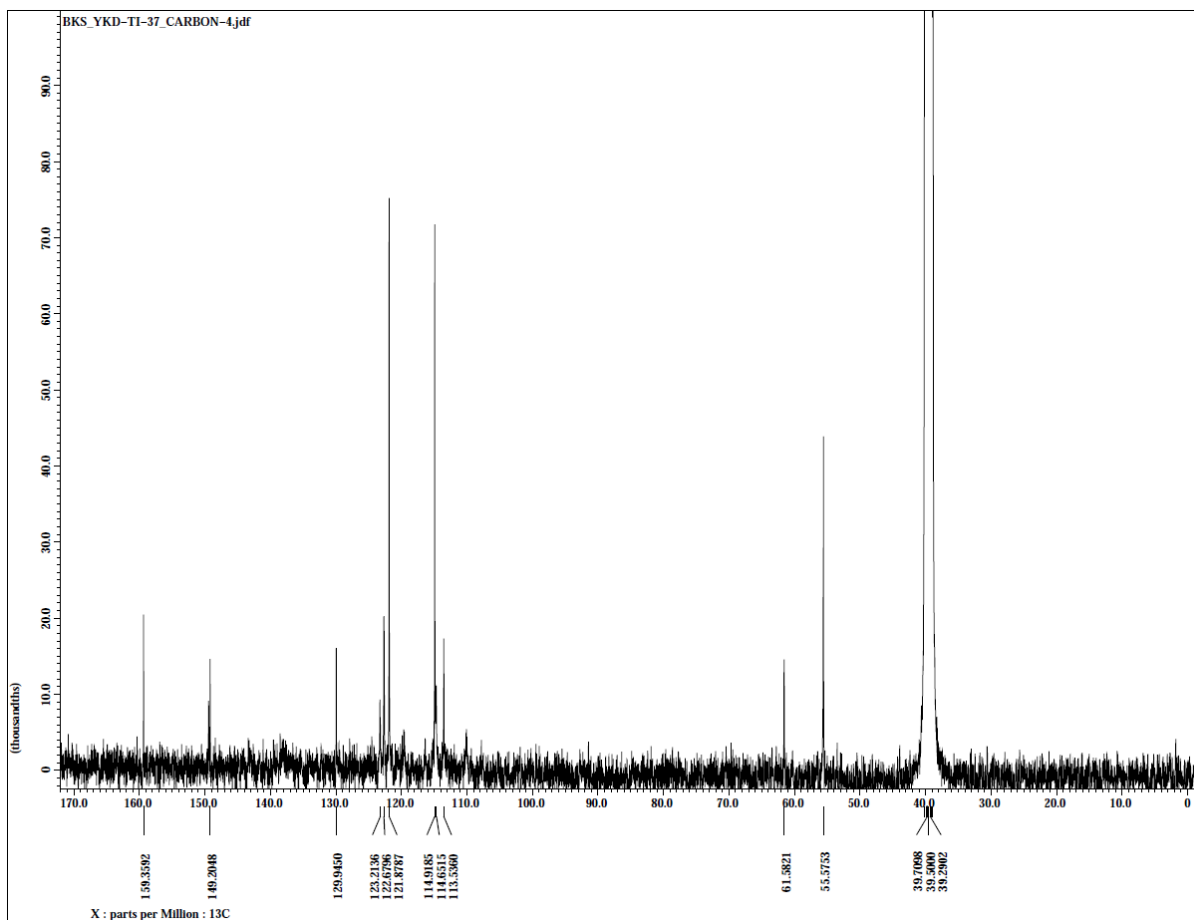

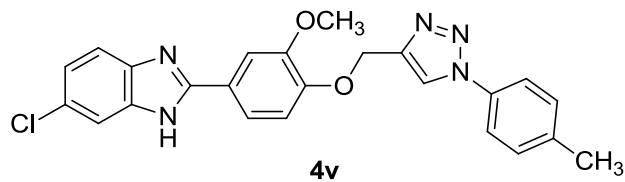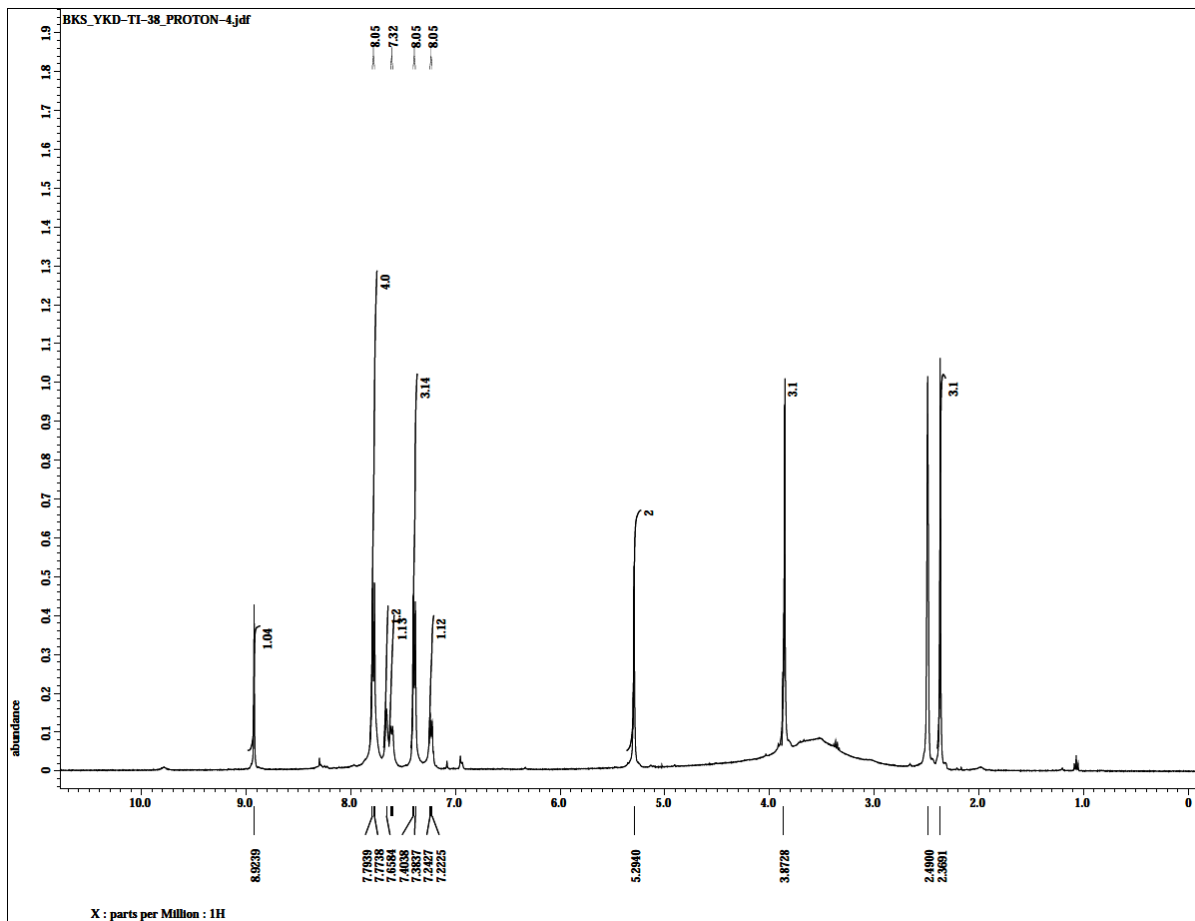

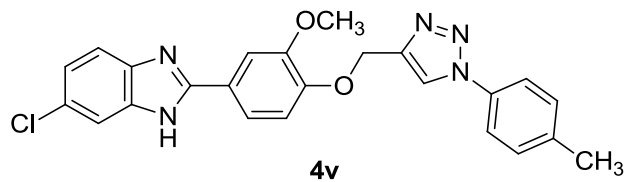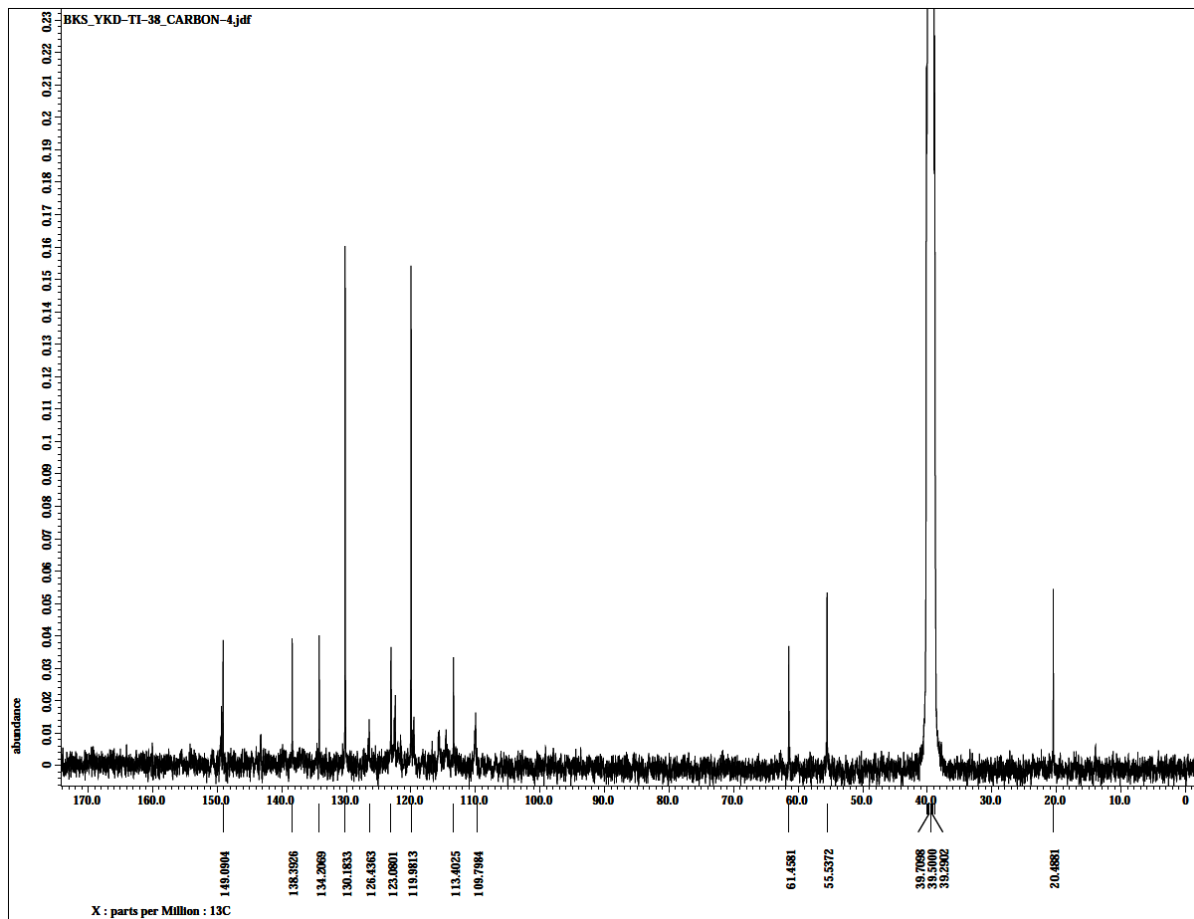



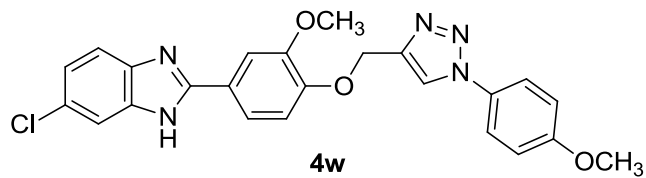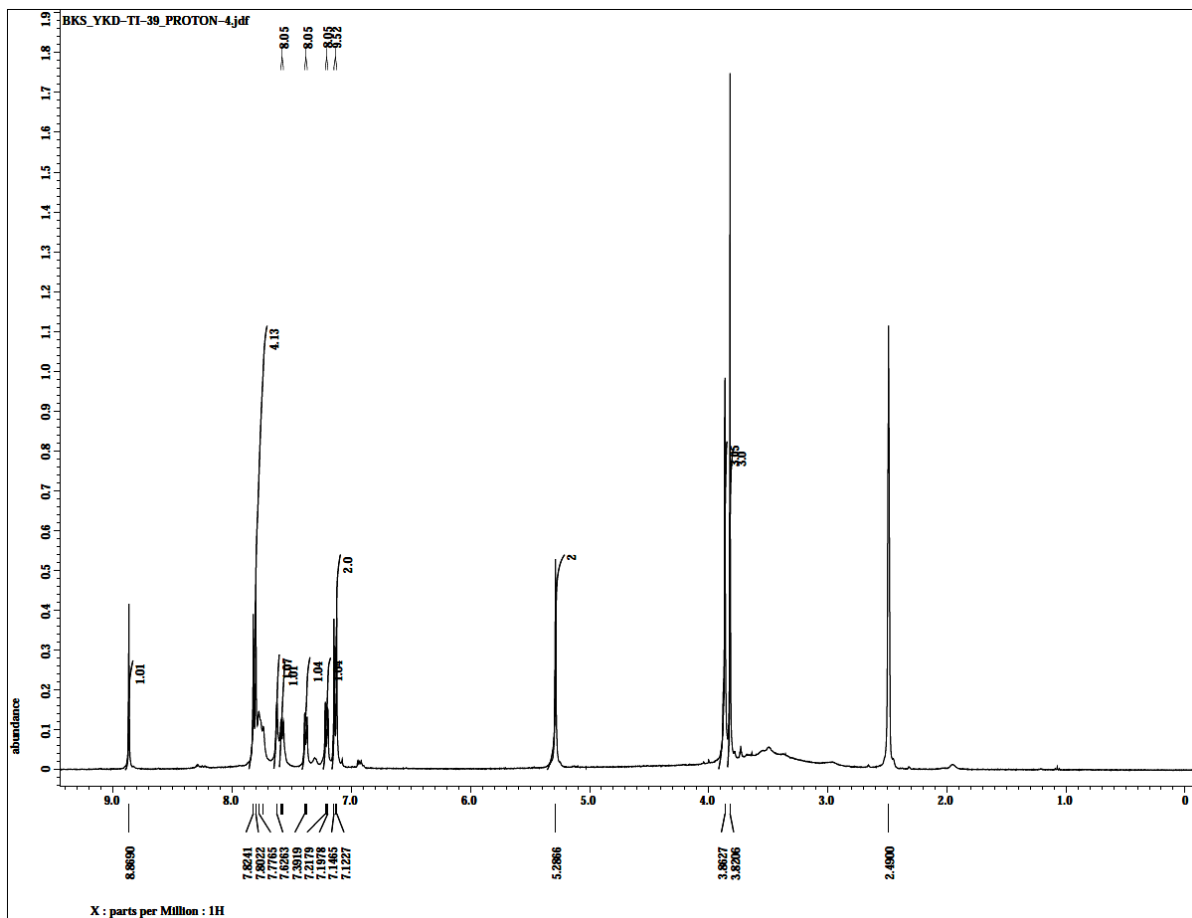

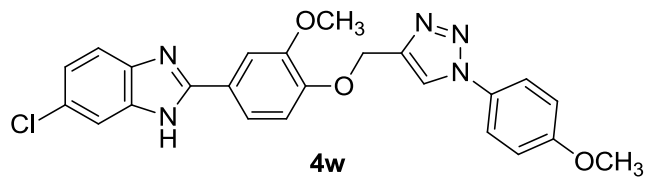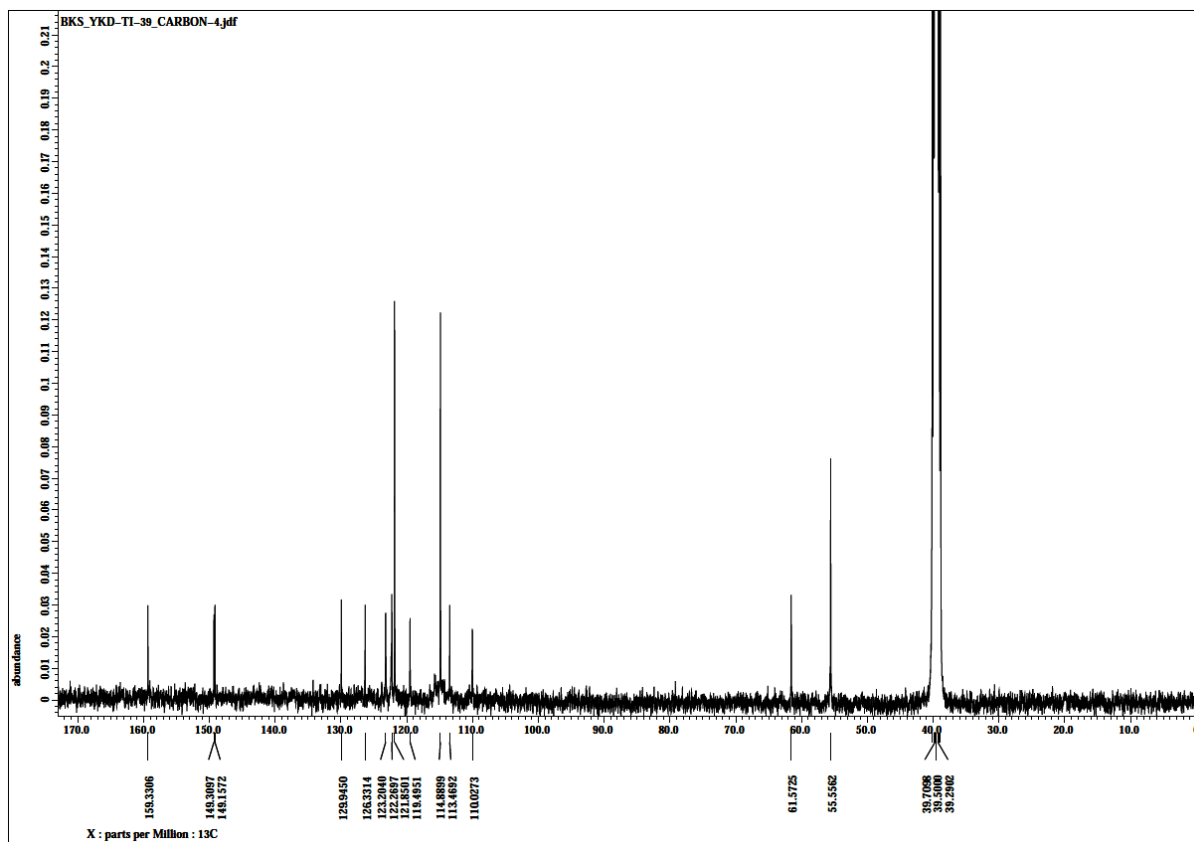

Supplement: Additional file 1 [file 1860-5397-10-145-S1.pdf]
